# Supplementary material for: Novel D–A chromophores with condensed 1,2,4-triazine system simultaneously display thermally activated delayed fluorescence and crystallization-induced phosphorescence
Source: Royal Society of Chemistry journal article supplement (doi:10.1039/d2cp00777k), 2022-01-01
Supplement: d2cp00777k1.pdf [file d2cp00777k1.pdf]

## **Novel Chromophores with Condensed 1,2,4-Triazine Simultaneously Displaying Thermally Activated Delayed Fluorescence and Crystallization-Induced Phosphorescence.**

Antonio Maggiore,<sup>\*a,b</sup> Xiaofeng Tan,<sup>c</sup> Arnaud Brosseau,<sup>a</sup> Andrew Danos,<sup>d</sup> Fabien Miomandre,<sup>a</sup> Andrew P Monkman,<sup>d</sup> Pierre Audebert,<sup>a</sup> and Gilles Clavier<sup>a</sup>

<sup>a</sup> Université Paris-Saclay, ENS Paris-Saclay, CNRS, PPSM, 91190 Gif-sur-Yvette, France

<sup>b</sup> *CNR-NANOTEC – Institute of Nanotechnology, c/o Campus Ecotekne, Via Monteroni, 73100 Lecce, Italy*

<sup>c</sup> Department of Polymer Chemistry and Technology, Kaunas University of Technology, Radvilenu plentas 19, LT50254 Kaunas, Lithuania

<sup>d</sup> Physics Department, Durham University, Durham DH1 3LE, U.K.

# Supporting Information

## Table of contents

|                                           |         |
|-------------------------------------------|---------|
| 1. Materials and methods                  | S3      |
| 2. Synthesis and characterization         | S3-S7   |
| 3. Quantum chemical calculations          | S8      |
| 4. Film processing                        | S8      |
| 5. Photophysical studies                  | S9      |
| 6. Supplementary data                     | S10     |
| Table S1                                  | S10     |
| Table S2                                  | S10     |
| Figure S1                                 | S10     |
| Figure S2                                 | S11     |
| Figure S3                                 | S12     |
| Table S3                                  | S13     |
| Table S4                                  | S13     |
| Figure S4                                 | S14     |
| Figure S5                                 | S14     |
| Table S5                                  | S15     |
| Table S6                                  | S15     |
| Figure S6                                 | S16     |
| Table S7                                  | S16     |
| Figure S7                                 | S17     |
| Table S8                                  | S17     |
| Table S9                                  | S18     |
| Figure S8                                 | S18     |
| Table S10                                 | S18     |
| Figure S9                                 | S19     |
| Figure S10                                | S19     |
| Figure S11                                | S19     |
| Figure S12                                | S20     |
| Figure S13                                | S20     |
| Figure S14                                | S21     |
| Figure S15                                | S22     |
| Figure S16                                | S23     |
| Figure S17                                | S23     |
| 7. NMR and MS spectra                     | S24-S36 |
| 8. Geometries of the calculated compounds | S37-S52 |
| References                                | S52     |

## 1. Materials and methods

All chemicals were received from commercial sources and used without further purification. Thin layer chromatography (TLC) was performed on silica gel. Solvent for synthesis (Carlo Erba) were purified with a MB SPS80 from MBraun. Column chromatography was performed with SDS 0.040–0.063 mm silica gel. All mixtures of solvents are given in v/v ratio. NMR spectra were recorded on a JEOL ECS (400 MHz) spectrometer.  $^{13}\text{C}$  NMR spectra were proton decoupled. HRMS spectra were measured either on an UPLC/ESI-HRMS device (an Acquity Waters UPLC system coupled to a Waters LCT Premier XE mass spectrometer equipped with an electrospray ion source), or a Q-TOF mass spectrometer (Q-TOF 6540, Agilent) equipped with an APPI ion source. TGA analysis were done with a Perkin Elmer Pyris 6.

## 2. Synthesis and characterization

The complete reaction scheme was as follows:

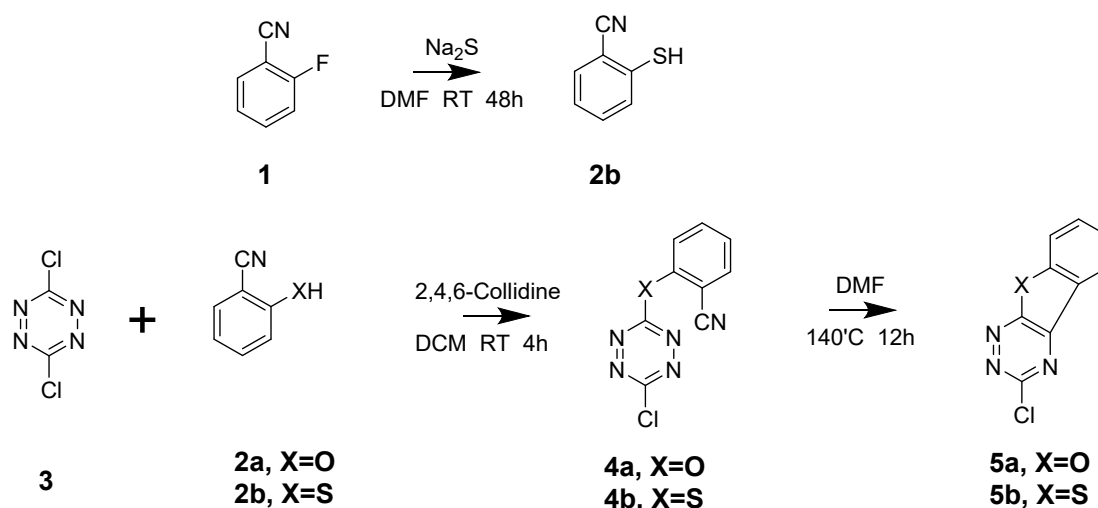

**Scheme S1. Synthetic Route to the Electron Accepting Monomers 5a and 5b.**

- 2-fluorobenzonitrile,  $\text{Na}_2\text{S}$ , DMF, RT, 48h;
- 3,6-dichloro-1,2,4,5-tetrazine, **2a/2b**, 2,4,6-Collidine, DCM, RT, 4h;
- 4a/4b**, DMF,  $140^\circ\text{C}$ , 12h.

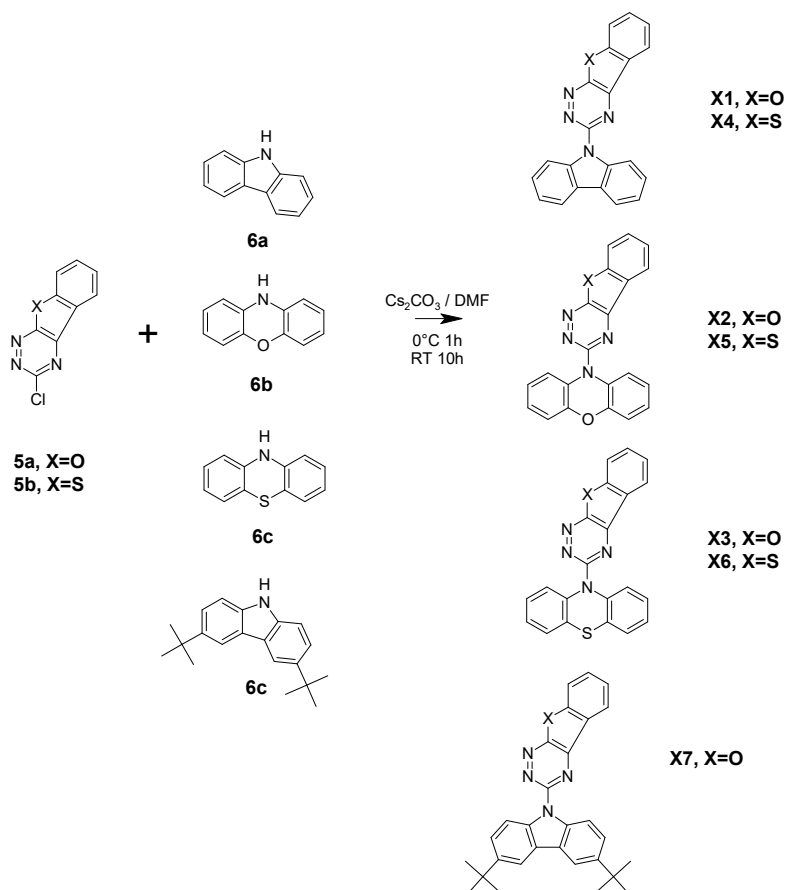

**Scheme S2. Synthetic Route to the final compounds X1-X7.**

**5a/5b, 6a/6b/6c/6d**,  $\text{Cs}_2\text{CO}_3$ , DMF,  $0^\circ\text{C}$ , 0.5h then RT, overnight.

**2-Mercaptobenzonitrile (2b).**<sup>1</sup> 2-Fluorobenzonitrile (6.0 g, 50 mmol),  $\text{Na}_2\text{S}$  (9.7 g 125 mmol), were added in 2-necked round bottom flask containing 30 mL of *N,N*-dimethylformamide. The mixture was stirred for 2 days at room temperature and the reaction was quenched with 1M NaOH aq (250 mL). The crude mixture was extracted with dichloromethane (2×75 mL). The aqueous layer was concentrated under vacuum, acidified with 1M HCl to pH≈1-2, extracted with dichloromethane (2×50 mL). The combined organic layers were dried under vacuum. 1M HCl (250mL) was added to the residue after evaporation and the mixture cooled with an ice bath. Zn (17.5 g) was added to the mixture and the reaction stirred for 1h. Ethyl acetate (500 mL) was added and the reaction stirred for another 0.5h. The organic layer was isolated, washed with brine, dried over  $\text{Na}_2\text{SO}_4$ , filtered and concentrated under vacuum. The crude oil was purified on by column chromatography ( $\text{SiO}_2$ ; eluent: n-hexane/ethyl acetate 50/1). The pure product was collected as a brown oil (4.86 g, 72%).

$^1\text{H}$  NMR (500 MHz,  $\text{CDCl}_3$ ):  $\delta$  7.58 (d,  $J = 7.8$  Hz, 1H), 7.37-7.46 (m, 2H), 7.20-7.25 (m, 1H), 4.09 (s, 1H).

$^{13}\text{C}$  NMR (125 MHz,  $\text{CDCl}_3$ ):  $\delta$  137.3, 133.5, 133.1, 129.5, 125.8, 117.5, 111.8.

**2-((6-chloro-1,2,4,5-tetrazin-3-yl)oxy)benzonitrile (4a).** 3,6-dichloro-1,2,4,5-tetrazine **3** (3.0 g, 20 mmol) and 2-hydroxybenzonitrile **2a** (2.4 g, 20 mmol) were added into the round flask containing dichloromethane (200 mL) purged with nitrogen. 2,4,6-Collidine was added after 5min of stirring. After stirring the mixture for 4h at room temperature, the solvent was evaporated and quickly purified by flash chromatography (SiO<sub>2</sub>; eluent: n-hexane/ethyl acetate 5/1 v/v) to recover 3.95 g (85%) of the expected product. Considering its instability, the intermediate product was used as such in the next step.

**2-((6-chloro-1,2,4,5-tetrazin-3-yl)thio)benzonitrile (4b).** 3,6-dichloro-1,2,4,5-tetrazine **3** (3.0 g, 20 mmol) and 2-mercaptobenzonitrile **2b** (2.7 g, 20 mmol) were introduced in a round bottom flask containing dichloromethane (200 mL) purged with nitrogen. 2,4,6-Collidine was added after 5min of stirring. After stirring the mixture for 4h at room temperature, the solvent was evaporated and quickly purified by flash chromatography (SiO<sub>2</sub>; eluent: n-hexane/ethyl acetate 5/1 v/v) to recover 1.64 g (33%) of the expected product. Considering its instability, the intermediate product was used as such in the next step.

**3-chlorobenzofuro[3,2-e][1,2,4]triazine (5a).** **4a** (3.95 g, 17 mmol) was dissolved in a round bottom flask containing *N,N*-dimethylformamide (170 mL). The solution was stirred overnight at 140°C. After returning to TA, the solvent was evaporated under vacuum. The crude product was purified by column chromatography (SiO<sub>2</sub>; eluent: n-hexane/ethyl acetate 10/1). The pure product was collected as yellow crystals (3.08 g, 88%).

<sup>1</sup>H NMR (400 MHz, CDCl<sub>3</sub>): δ 8.25 (dd, *J* = 7.6, 1.0 Hz, 1H), 7.89 (td, *J* = 7.4, 1.3 Hz, 1H), 7.73 (d, *J* = 9.2 Hz, 1H), 7.57 (t, *J* = 8.0 Hz, 1H).

<sup>13</sup>C NMR (100 MHz, CDCl<sub>3</sub>): δ 161.07, 160.37, 159.41, 145.65, 136.33, 136.02, 124.97, 118.32, 113.72.

**3-chlorobenzo[4,5]thieno[3,2-e][1,2,4]triazine (5b).** **4b** (1.64 g, 6.6 mmol) was dissolved in a round bottom flask containing *N,N*-dimethylformamide (66 mL). Stirring overnight at 140 °C. The solution was stirred overnight at 140°C. After returning to TA, the solvent was evaporated under vacuum. The crude product was purified by column chromatography (SiO<sub>2</sub>; eluent: n-hexane/ethyl acetate 10/1). The pure product was collected as yellow crystals (1.32 g, 90%).

<sup>1</sup>H NMR (400 MHz, CDCl<sub>3</sub>): δ 8.54 (d, *J* = 7.9 Hz, 1H), 7.94 (dd, *J* = 8.3, 0.7 Hz, 1H), 7.81 (td, *J* = 7.3 1.3 Hz, 1H), 7.63 (td, *J* = 7.4, 0.8 Hz, 1H).

<sup>13</sup>C NMR (100 MHz, CDCl<sub>3</sub>): δ 161.30, 161.14, 152.06, 142.75, 134.18, 128.77, 126.83, 126.52, 124.02.

**General Procedure for the synthesis of X1-X7.**

**5** (1 mmol) and **6** (3 mmol) were introduced in a round bottom flask containing *N,N*-dimethylformamide (40 mL) purged with nitrogen. The mixture was cooled to 0°C under nitrogen flow. Cs<sub>2</sub>CO<sub>3</sub> (0.65 g, 2 mmol) was added at once and the reaction stirred for 0.5h. The reaction was slowly brought back to room temperature and stirred for another 10h. The reaction was quenched by addition of H<sub>2</sub>O and extracted twice with dichloromethane. The combined organic layers were dried over Na<sub>2</sub>SO<sub>4</sub>, filtered and concentrated in vacuum. The crude product was purified by column chromatography (SiO<sub>2</sub>; eluent: n-hexane/ethyl acetate 10/1) and recrystallization from dichloromethane/petroleum ether.

**3-(9H-carbazol-9-yl)benzofuro[3,2-e][1,2,4]triazine (X1)**. This compound was prepared from **5a** (0.2 g, 1 mmol) and **6a** (0.5 g, 3 mmol) according to the general procedure. The product was collected as yellow needle-like crystals (0.15 g, 45%).

<sup>1</sup>H NMR (400 MHz, CDCl<sub>3</sub>): δ 8.82 (d, *J* = 8.4 Hz, 2H), 8.36 (d, *J* = 8.4 Hz, 1H), 8.07 (d, *J* = 7.8 Hz, 2H), 7.86 (td, *J* = 8.48, 1.3 Hz, 1H), 7.74 (d, *J* = 8.5 Hz, 1H), 7.58-7.51 (m, 3H), 7.39 (td, *J* = 7.6, 0.72 Hz, 2H).

<sup>13</sup>C NMR (100 MHz, CDCl<sub>3</sub>): δ 159.20, 158.17, 143.84, 139.00, 135.29, 126.94, 125.92, 125.31, 124.73, 122.76, 119.77, 119.49, 115.72, 113.58

MS (EI) calcd. for C<sub>21</sub>H<sub>13</sub>N<sub>4</sub>O 337.1083 (M+H<sup>+</sup>), found 337.1083.

**10-(benzofuro[3,2-e][1,2,4]triazin-3-yl)-10H-phenoxazine (X2)**. This compound was prepared from **5a** (0.2 g, 1 mmol) and **6b** (0.55 g, 3 mmol) according to the general procedure. The product was collected as yellow flaky crystals (0.11 g, 31%).

<sup>1</sup>H NMR (400 MHz, CDCl<sub>3</sub>): δ 8.16 (dd, *J* = 7.8, 1.2 Hz, 1H), 7.87-7.84 (m, 2H), 7.78 (td, *J* = 7.4, 1.4 Hz, 1H), 7.66 (d, *J* = 7.4 Hz, 1H), 7.46 (t, *J* = 8.3 Hz, 1H), 7.17-7.10 (m, 6H).

<sup>13</sup>C NMR (100 MHz, CDCl<sub>3</sub>): δ 159.88, 159.22, 159.14, 151.02, 143.72, 134.82, 130.58, 126.10, 125.55, 124.87, 124.66, 123.15, 119.61, 116.92, 113.42.

MS (EI) calcd. for C<sub>21</sub>H<sub>13</sub>N<sub>4</sub>O<sub>2</sub> 353.1033 (M+H<sup>+</sup>), found 353.1039.

**10-(benzofuro[3,2-e][1,2,4]triazin-3-yl)-10H-phenothiazine (X3)**. This compound was prepared from **5a** (0.2 g, 1 mmol) and **6c** (0.60 g, 3 mmol) according to the general procedure. The product was collected as yellow flaky crystals (0.02 g, 5%).

<sup>1</sup>H NMR (400 MHz, CDCl<sub>3</sub>): δ 8.08 (dd, *J* = 7.7, 1.1 Hz, 1H), 7.86 (dd, *J* = 8.0, 1.2 Hz, 2H), 7.74 (td, *J* = 7.4, 1.4 Hz, 1H), 7.62 (d, *J* = 8.6 Hz, 1H), 7.46 (dd, *J* = 8.0, 1.5 Hz, 2H), 7.44-7.37 (m, 3H), 7.26-7.22 (td, *J* = 7.5, 1.3 Hz, 2H).

<sup>13</sup>C NMR (100 MHz, CDCl<sub>3</sub>): δ 159.58, 159.07, 143.56, 139.94, 134.57, 133.36, 128.50, 128.19, 126.88, 126.46, 124.67, 119.72, 113.32.

MS (EI) calcd. for C<sub>21</sub>H<sub>13</sub>N<sub>4</sub>OS 369.0805 (M+H<sup>+</sup>), found 369.0792.

**3-(9H-carbazol-9-yl)benzo[4,5]thieno[3,2-e][1,2,4]triazine (X4).** This compound was prepared from **5b** (0.22 g, 1 mmol) and **6a** (0.5 g, 3 mmol) according to the general procedure. The product was collected as yellow needle-like crystals (0.16 g, 45%).

<sup>1</sup>H NMR (400 MHz, CDCl<sub>3</sub>): δ 8.94 (d, *J* = 8.5 Hz, 2H), 8.65 (d, *J* = 7.7 Hz, 1H), 8.10 (d, *J* = 7.0 Hz, 2H), 7.96 (d, *J* = 8.2 Hz, 1H), 7.80 (td, *J* = 8.3, 1.2 Hz, 1H), 7.66 (td, *J* = 8.0, 0.7 Hz, 1H), 7.57 (td, *J* = 7.2, 1.2 Hz, 2H), 7.42 (td, *J* = 7.8, 0.6 Hz, 2H).

<sup>13</sup>C NMR (100 MHz, CDCl<sub>3</sub>): δ 158.06, 157.25, 150.53, 142.63, 138.99, 133.40, 129.99, 127.00, 126.36, 126.18, 124.07, 122.92, 119.82, 116.20.

MS (EI) calcd. for C<sub>21</sub>H<sub>13</sub>N<sub>4</sub>S 353.0855 (M+H<sup>+</sup>), found 353.0854.

**10-(benzo[4,5]thieno[3,2-e][1,2,4]triazin-3-yl)-10H-phenoxazine (X5).** This compound was prepared from **5b** (0.22 g, 1 mmol) and **6b** (0.55 g, 3 mmol) according to the general procedure. The product was collected as yellow flaky crystals (0.14 g, 38%).

<sup>1</sup>H NMR (400 MHz, CDCl<sub>3</sub>): δ 8.34 (dd, *J* = 7.8, 1.0 Hz, 1H), 7.98-7.94 (m, 2H), 7.85 (d, *J* = 8.0 Hz, 1H), 7.69 (td, *J* = 7.4, 1.3 Hz, 1H), 7.51 (td, *J* = 7.9, 0.8 Hz, 1H), 7.20-7.13 (m, 6H).

<sup>13</sup>C NMR (100 MHz, CDCl<sub>3</sub>): δ 158.68, 156.40, 151.27, 150.31, 142.55, 132.91, 130.15, 130.07, 126.29, 126.11, 125.93, 125.87, 123.86, 123.04, 116.94.

MS (EI) calcd. for C<sub>21</sub>H<sub>13</sub>N<sub>4</sub>OS 369.0805 (M+H<sup>+</sup>), found 369.0808.

**10-(benzo[4,5]thieno[3,2-e][1,2,4]triazin-3-yl)-10H-phenothiazine (X6).** This compound was prepared from **5b** (0.22 g, 1 mmol) and **6c** (0.60 g, 3 mmol) according to the general procedure. The product was collected as yellow flaky crystals (0.13 g, 34%).

<sup>1</sup>H NMR (400 MHz, CDCl<sub>3</sub>): δ 8.24 (d, *J* = 8.5 Hz, 1H), 7.89 (dd, *J* = 8.1, 1.1 Hz, 2H), 7.82 (d, *J* = 8.0 Hz, 1H), 7.66 (td, *J* = 7.3, 1.2 Hz, 1H), 7.46 (td, *J* = 7.8, 1.2 Hz, 3H), 7.40 (td, *J* = 7.6, 1.4 Hz, 2H), 7.25 (td, *J* = 7.7, 1.3 Hz, 2H).

<sup>13</sup>C NMR (100 MHz, CDCl<sub>3</sub>): δ 159.02, 155.64, 150.32, 142.53, 129.52, 133.27, 132.74, 130.16, 128.47, 128.16, 126.75, 126.52, 125.91, 125.68, 123.78.

MS (EI) calcd. for C<sub>21</sub>H<sub>13</sub>N<sub>4</sub>S<sub>2</sub> 385.0576 (M+H<sup>+</sup>), found 385.0572.

**3-(3,6-di-*tert*-butyl-9H-carbazol-9-yl)benzofuro[3,2-e][1,2,4]triazine (X7).** This compound was prepared from **5a** (0.20 g, 1 mmol) and **6d** (0.84 g, 3 mmol) according to the general procedure. The product was collected as yellow needle-like crystals (0.12 g, 27%).

<sup>1</sup>H NMR (400 MHz, CDCl<sub>3</sub>): δ 8.74 (d, *J* = 8.8 Hz, 2 H), 8.33 (d, *J* = 7.8 Hz, 1 H), 8.03 (d, *J* = 1.7 Hz, 2 H), 7.74-7.85 (m, 1 H), 7.69 (d, *J* = 8.6 Hz, 1 H), 7.45-7.61 (m, 3 H), 1.43 (s, 18 H)

$^{13}\text{C}$  NMR (100 MHz,  $\text{CDCl}_3$ ):  $\delta$  159.12, 145.76, 143.69, 137.32, 135.05, 126.05, 125.17, 124.59, 124.47, 119.62, 115.76, 115.49, 113.54, 34.82, 31.87.

MS (EI) calcd. for  $\text{C}_{29}\text{H}_{29}\text{N}_4\text{O}$  449.2336 (M+H<sup>+</sup>), found 449.2338.

### 3. Quantum chemical calculations

Ground state geometries were optimized at the PBE0/6-31+g(d,p) level of calculation followed by a frequency calculation. TDDFT on these geometries were done at the PBE0/6-311+g(d,p) level of theory looking for both singlets and triplets levels in vacuo and including toluene solvent effect with IEFPCM model. Then first singlet excited state geometries were optimized at the PBE0/6-31+g(d,p) level followed by a frequency calculation at the same level. Finally, a TDDFT calculation was done on these S1 optimized geometries at the PBE0/6-311+g(d,p) level of theory looking for both singlets and triplets levels in vacuo and including toluene solvent effect with IEFPCM model.

For all geometries frequency calculations gave only real values confirming that all structures are true minima. The excited states nature was attributed based on NTO analysis of the relevant transitions. All NTO account for at least 99.5% of the transition. All calculations were done with Gaussian 16 (Revision B.01) software.<sup>2</sup> Data were analyzed with GaussView 6.0 (molecular orbitals, NTO and density difference between excited state and ground state plots), PyMOL (The PyMOL Molecular Graphics System, Version 2.1.1 Schrödinger, LLC; molecular structures plots), Mercury 4.1.0 (angles measurements), GaussSum3.0<sup>3</sup> (energy levels of molecular orbitals) and Multiwfn3.7 (Density indexes)<sup>4</sup> softwares.

### 4. Film processing

#### a) Doped PMMA films casting

All blends were obtained by drop-casting DCM solutions (0.1 g/L) of the compounds at room temperature on quartz slides followed by slow (1 night) evaporation in solvent saturated conditions. Concentration of the fluorophore in the film is reported in weight percentage (w/w) relative to the polymer mass in the solution. All blends formed clear, glassy, transparent solid films.

#### b) Neat films casting

All films were obtained by drop-casting DCM solutions at room temperature followed by slow (1 night) evaporation in solvent saturated conditions. The compounds **X2**, **X3**, **X5** and **X6** formed clear, glassy, transparent solid films; on the other hand, compounds **X1**, **X4**, and **X7** formed polycrystalline films.

#### c) polycrystalline powders

As synthesized powders were collected from PE/DCM solution and studied in a 1mm quartz cuvette.



## 5. Photophysical studies

Absorption spectra were collected using a Cary 4000 double beam spectrophotometer (Agilent). Luminescence spectra were collected on a FluoroLog3 fluorescence spectrometer (Horiba Jobin Yvon). The relative photoluminescence quantum yields in solution were determined from corrected emission spectra using quinine dication ( $\Phi_{\text{PL}} = 0.59$  in  $\text{HClO}_4$ )<sup>5</sup> as the standard.

Photoluminescence quantum yield of the films were measured by an absolute method with a barium sulphate-coated integrating sphere F-3018(Horiba) inserted into the spectrofluorimeter sample compartment.

Fluorescence (PF and DF) and phosphorescence spectra and decays in solid state (PMMA, neat film, polycrystalline powder) were recorded by nanosecond gated luminescence and lifetime measurements (from 400 ps to 1 s) using either third harmonics of a high-energy, pulsed Nd:YAG laser emitting at 355 nm (EKSPLA) or a  $\text{N}_2$  laser emitting at 337 nm. Emission was focused onto a spectrograph and detected on a sensitive gated ICCD camera (Stanford Computer Optics) of subnanosecond resolution. PF/DF time-resolved measurements were performed by exponentially increasing gate and delay times. Lifetimes were extracted by a multi-exponential mathematical fit.

The ns fluorescence decay curves in solution, were obtained by the time-correlated single-photon counting (TCSPC) method with a femtosecond laser excitation composed of a Titanium Sapphire laser (Tsunami, Spectra-Physics) pumped by a doubled Nd:YVO<sub>4</sub> laser (Millennia Xs, Spectra-Physics). The fluorescence data were analyzed using the Globals software package developed at the Laboratory for Fluorescence Dynamics at the University of Illinois at Urbana-Champaign, which includes reconvolution analysis and global non-linear least-squares minimization method. The quality of the fit was estimated by visual inspection of the weighted residuals and calculation of  $\chi^2$ .

The  $\mu\text{s}$  fluorescence decay curves in solution were obtained using an Edinburgh instrument LP920 laser flash photolysis spectrometer combined with an Nd:YAG laser (Continuum) tripled at 355 nm via non-linear crystals. The Levenberg Marquardt algorithm was used for non-linear least square fit (tail fit) as implemented in the L900 software (Edinburgh instrument). The quality of the fit was estimated by visual inspection of the weighted residuals and calculation of  $\chi^2$ .

## 6. Supplementary data

**Table S1** Thermal decomposition temperature ( $T_d$ ) and melting points (mp) of the fused 1,2,4-triazines.

|           | $T_d$ (°C) | mp (°C) |
|-----------|------------|---------|
| <b>X1</b> | 306        | 228     |
| <b>X2</b> | 285        | 205     |
| <b>X3</b> | 298        | 257     |
| <b>X4</b> | 310        | 256     |
| <b>X5</b> | 288        | 223     |
| <b>X6</b> | 319        | 256     |
| <b>X7</b> | 321        | 307     |

**Table S2** Calculated main angles for the ground state structures of the fused 1,2,4-triazines

|           | A (°) <sup>a</sup> | D (°) <sup>b</sup> | A-D (°) <sup>c</sup> | A-D dihedral angle (°) |
|-----------|--------------------|--------------------|----------------------|------------------------|
| <b>X1</b> | 0.06               | 1.06               | 15.32                | 14.74                  |
| <b>X2</b> | 0.22               | 35.39              | 45.88                | 9.60                   |
| <b>X3</b> | 0.14               | 46.98              | 56.71                | 5.65                   |
| <b>X4</b> | 0.31               | 1.13               | 16.40                | 15.53                  |
| <b>X5</b> | 0.03               | 35.35              | 45.46                | 9.34                   |
| <b>X6</b> | 0.07               | 46.90              | 56.31                | 5.44                   |
| <b>X7</b> | 0.03               | 0.56               | 7.71                 | 7.39                   |

a) A angle refers to the calculated angle between the mean planes of the two rings of the fused 1,2,4-triazine acceptors; b) D angle refers to the calculated angle between the mean planes of the two phenyl rings of the Donor; c) A-D angle refers to the calculated angle between the mean planes of the Donor and the Acceptor.

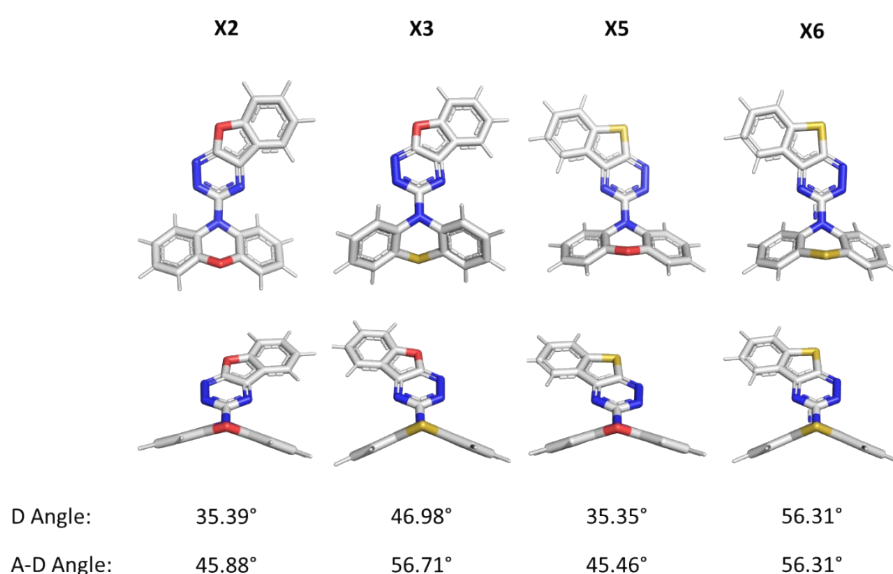

**Fig. S1** Optimized ground state structures of, from left to right, **X2**, **X3**, **X5** and **X6**. D angle refers to the calculated angle between the mean planes of the two phenyl rings of the Donor; D-A angle refers to the calculated angle between the mean planes of the Donor and the Acceptor.

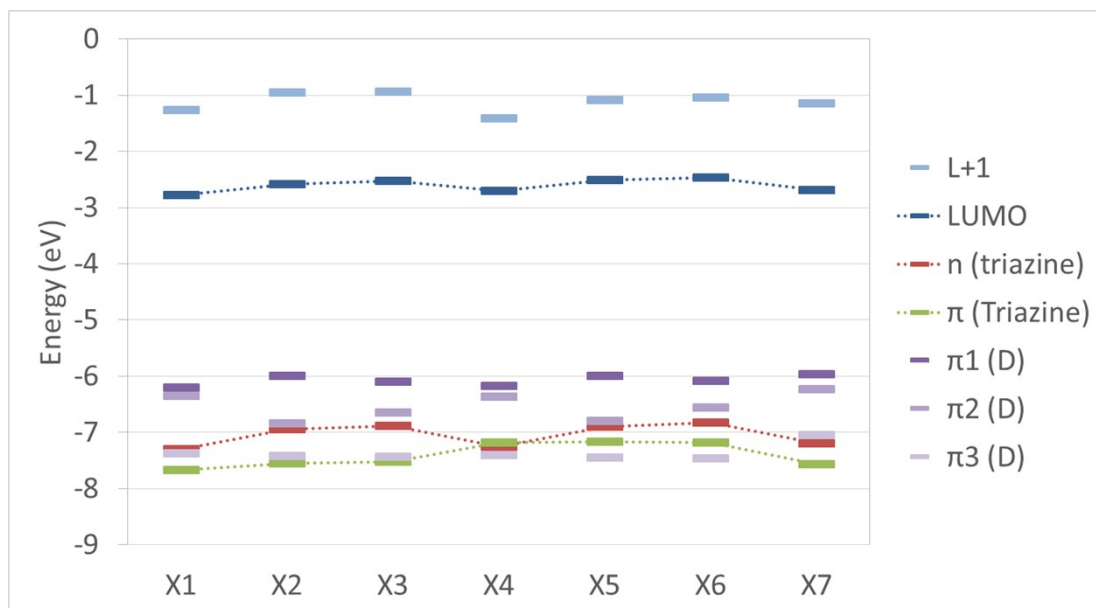

**Fig. S2** Energy levels of the frontier molecular orbitals of the fused 1,2,4-triazines **X1-7**.

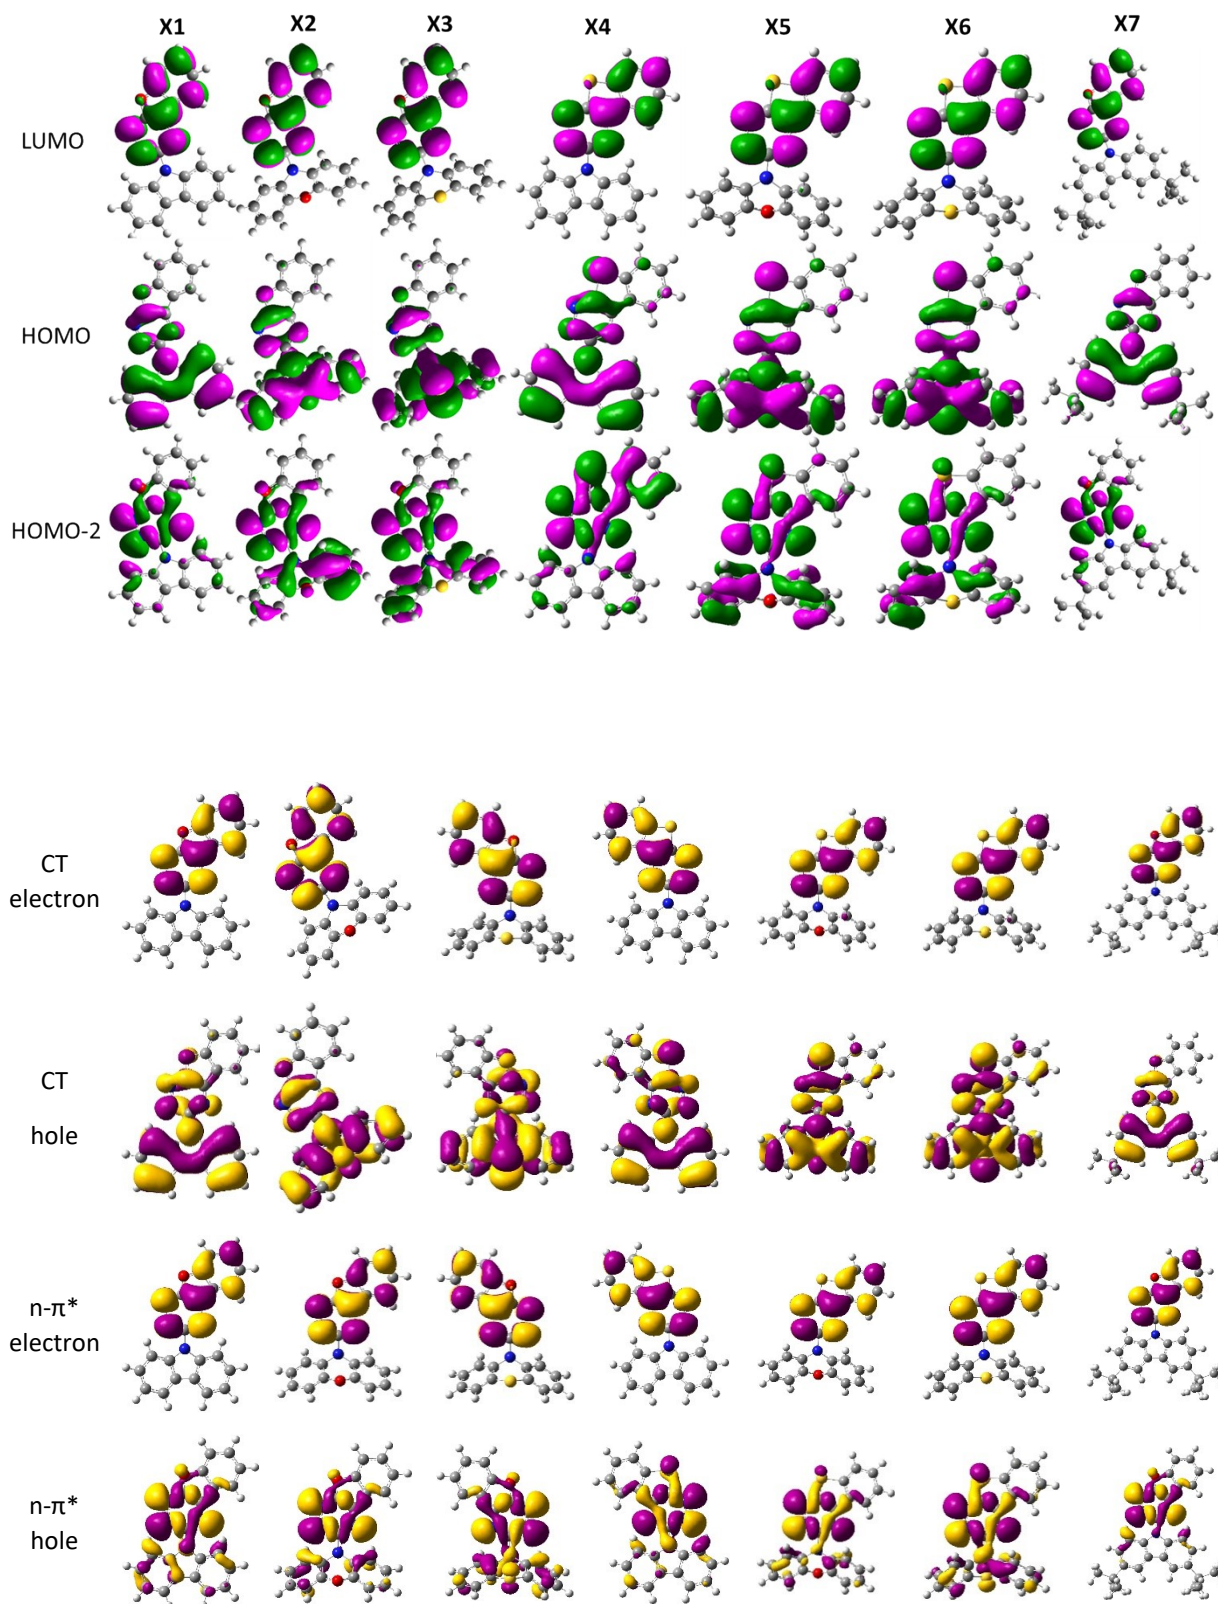

**Fig. S3 top)** Electron density distributions in molecular orbitals involved in the first two calculated transitions of D-A as-triazines. **Bottom)** NTO for the CT and n- $\pi^*$  transitions reported in Table S3.

**Table S3** Calculated values of two lowest energy transitions and singlet – triplet energy differences at the ground state geometries for **X1-7** in vacuum and including toluene solvent effect.

|           | vacuum                        |                              | toluene                       |                              |
|-----------|-------------------------------|------------------------------|-------------------------------|------------------------------|
|           | $\lambda_{\text{calc}}$ (nm)  | $\Delta E_{\text{S-T}}$ (eV) | $\lambda_{\text{calc}}$ (nm)  | $\Delta E_{\text{S-T}}$ (eV) |
| <b>X1</b> | 462 (CT)<br>411 (n- $\pi^*$ ) | 0.45                         | 449 (CT)<br>402 (n- $\pi^*$ ) | 0.47                         |
| <b>X2</b> | 467 (CT)<br>424 (n- $\pi^*$ ) | 0.50                         | 462 (CT)<br>415 (n- $\pi^*$ ) | 0.50                         |
| <b>X3</b> | 438 (CT)<br>423 (n- $\pi^*$ ) | 0.54                         | 435 (CT)<br>415 (n- $\pi^*$ ) | 0.57                         |
| <b>X4</b> | 454 (CT)<br>413 (n- $\pi^*$ ) | 0.50                         | 445 (CT)<br>406 (n- $\pi^*$ ) | 0.50                         |
| <b>X5</b> | 458 (CT)<br>424 (n- $\pi^*$ ) | 0.51                         | 457 (CT)<br>418 (n- $\pi^*$ ) | 0.51                         |
| <b>X6</b> | 434 (CT)<br>421 (n- $\pi^*$ ) | 0.55                         | 433 (CT)<br>416 (n- $\pi^*$ ) | 0.60                         |
| <b>X7</b> | 481 (CT)<br>426 (n- $\pi^*$ ) | 0.42                         | 470 (CT)<br>406 (n- $\pi^*$ ) | 0.43                         |

**Charge transfer quantification.**

**Table S4** Calculated values of D and t indexes of the CT transition for the GS geometry as defined in the hole-electron formalism obtained with the Multiwfn 3.7 code<sup>6</sup>. (Values in parenthesis calculated on the S1 optimized states)

| Compound  | D index (Å)   | t index (Å)   |
|-----------|---------------|---------------|
| <b>X1</b> | 4.226 (4.889) | 2.072 (3.102) |
| <b>X2</b> | 4.017 (4.817) | 1.970 (3.265) |
| <b>X3</b> | 3.985 (5.112) | 1.895 (3.467) |
| <b>X4</b> | 3.266 (4.692) | 0.862 (2.900) |
| <b>X5</b> | 3.384 (4.676) | 1.143 (3.178) |
| <b>X6</b> | 3.547 (4.977) | 1.344 (3.384) |
| <b>X7</b> | 4.576 (5.092) | 2.384 (3.247) |

Note D index refers to magnitude of CT length and t index is designed to measure separation degree of hole and electron.

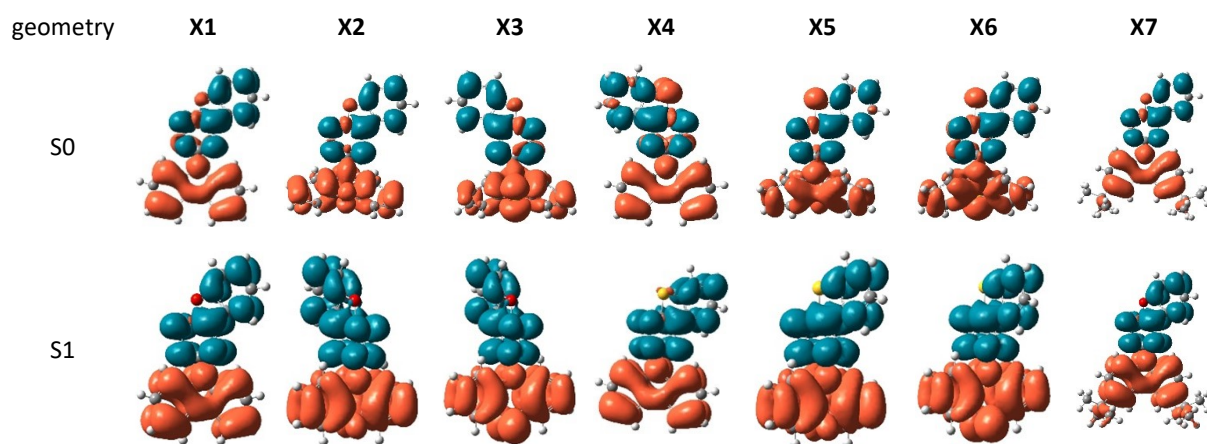

**Fig. S4** Density difference between excited state and ground state for the first singlet excited state in the S0 and S1 optimized geometries (orange means density decrease and blue density increase)

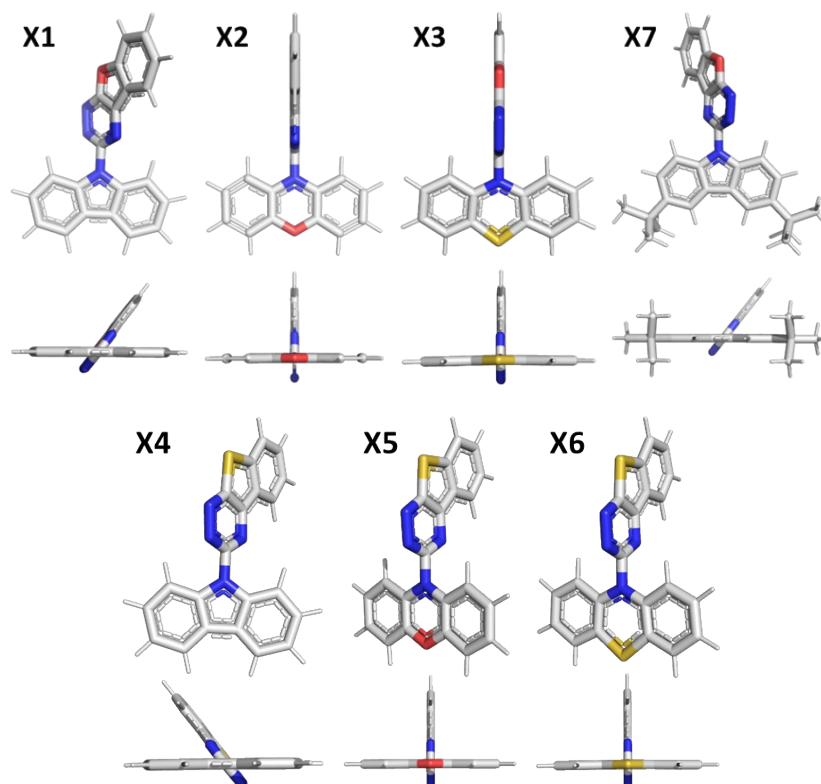

**Fig. S5** Optimized molecular structures of the first excited states of the as-triazines

**Table S5** Calculated D-A angles and  $\Delta E_{S-T}$  in vacuo and including toluene solvent effect at the S1 geometry for **X1-7**.

|           | <b>A-D (°)<sup>a</sup></b> | $\Delta E_{S-T}$ in vacuo (eV) | $\Delta E_{S-T}$ in toluene (eV) |
|-----------|----------------------------|--------------------------------|----------------------------------|
| <b>X1</b> | 52.23                      | 0.09                           | 0.10                             |
| <b>X2</b> | 89.99                      | 0.02                           | 0.02                             |
| <b>X3</b> | 89.99                      | 0.02                           | 0.02                             |
| <b>X4</b> | 52.03                      | 0.10                           | 0.11                             |
| <b>X5</b> | 90.00                      | 0.02                           | 0.02                             |
| <b>X6</b> | 89.98                      | 0.02                           | 0.02                             |
| <b>X7</b> | 51.75                      | 0.09                           | 0.09                             |

<sup>a</sup>A-D angle refers to the calculated angle between the mean planes of the Acceptor and the Donor.

**Table S6**

|           | $\lambda_{exp}$ (nm) | $\lambda_{calc}$ (nm) (toluene) | MAE (%) |
|-----------|----------------------|---------------------------------|---------|
| <b>X1</b> | 416                  | 449                             | 7.9     |
| <b>X2</b> | 429                  | 462                             | 7.7     |
| <b>X3</b> | 398                  | 435                             | 9.3     |
| <b>X4</b> | 419                  | 445                             | 6.2     |
| <b>X5</b> | 431                  | 457                             | 6.0     |
| <b>X6</b> | 422                  | 433                             | 2.6     |
| <b>X7</b> | 427                  | 470                             | 10.1    |

$$MAE = \frac{|\lambda_{exp} - \lambda_{calc}|}{\lambda_{exp}} \times 100$$

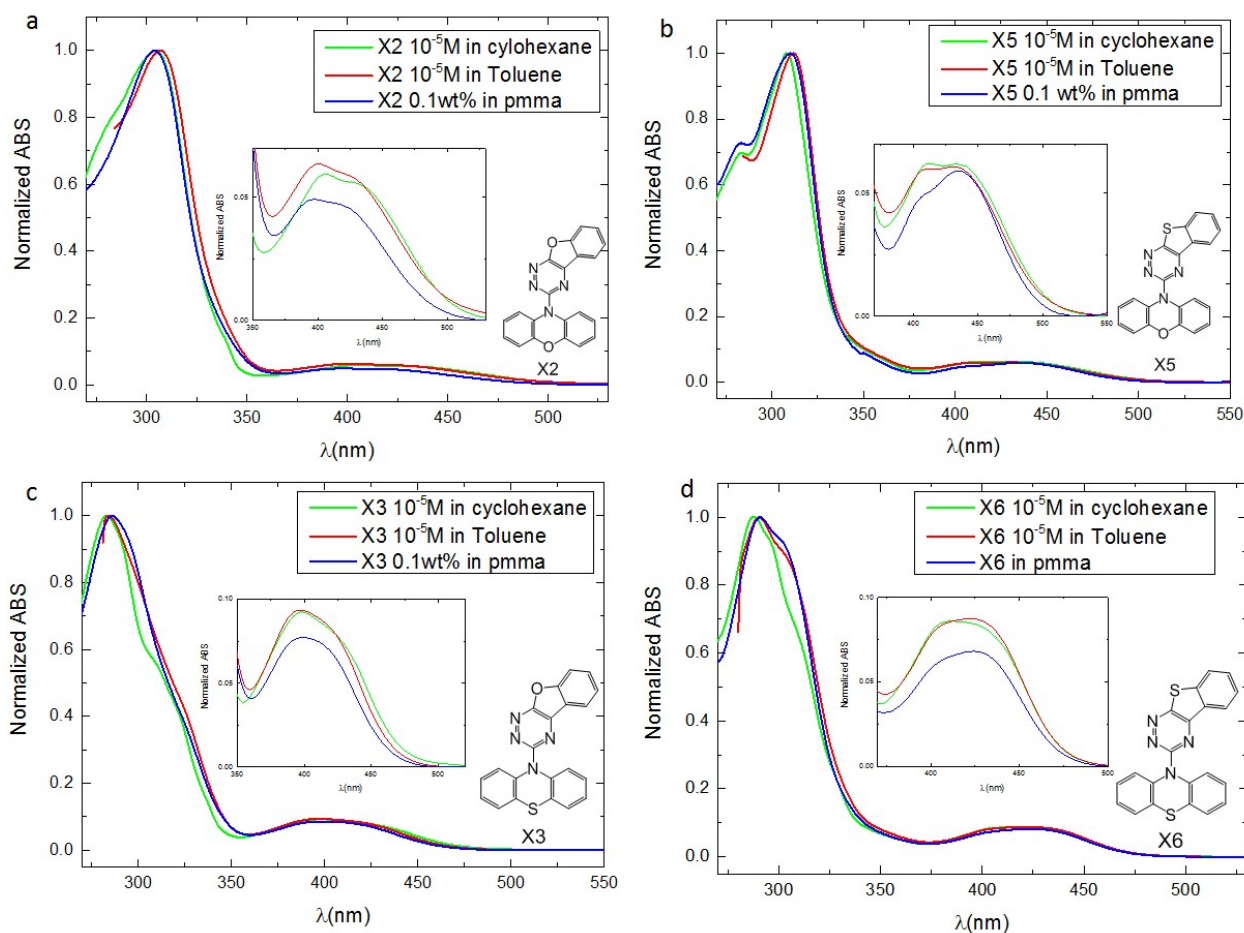

**Fig. S6** Absorption spectra of (a) **X2**, (c) **X3**, (b) **X5** and (d) **X6** in cyclohexane ( $10^{-5}$  M, green), toluene ( $10^{-5}$  M, red), and PMMA (0.1wt%, blue). Inset: zoom of the low energy region between 350 nm and 550 nm.

**Table S7** Maximum absorption and emission wavelengths for X1-X7 in cyclohexane, toluene and DCM.

| MOLECULE  | Absorption (nm)                              |                                    |                                    | Emission (nm)    |         |      |
|-----------|----------------------------------------------|------------------------------------|------------------------------------|------------------|---------|------|
|           | Cyclohexane                                  | Toluene                            | DCM                                | Cyclohexane      | Toluene | DCM  |
| <b>X1</b> | 454(s), 432, 412, 393, 323, 309, 297(s), 288 | 416(s), 388, 325, 312, 298(s), 289 | 414(s), 381, 324, 311, 299(s), 289 | 548(s), 510, 477 | 556     | 609  |
| <b>X2</b> | 433(s), 405, 304, 283(s)                     | 429(s), 401, 306                   | n.m.                               | 388              | 385     | n.e. |
| <b>X3</b> | 397,310(s),283                               | 398, 284                           | n.m.                               | 566, 416         | n.e.    | n.e. |
| <b>X4</b> | 454, 433,413(s), 397, 325, 311, 296, 287     | 419, 399, 327, 315, 296, 288       | 423, 392, 327, 314, 296, 289       | 547(s), 504,474  | 543     | 601  |
| <b>X5</b> | 432, 413, 308, 284                           | 431, 412, 312, 284                 | n.m.                               | 394              | 398     | n.e. |
| <b>X6</b> | 413, 308(s), 296(s), 288                     | 422, 301(s), 290                   | n.m.                               | n.e.             | n.e.    | n.e. |
| <b>X7</b> | 479(s), 450, 430, 400                        | 427, 395, 383, 331, 317            | 426, 389, 330, 316, 301, 294       | 589(s), 544, 508 | 599     | 648  |

(s)=shoulder, n.e.= non-emissive, n.m.=not measured (as the solution was non-emissive).



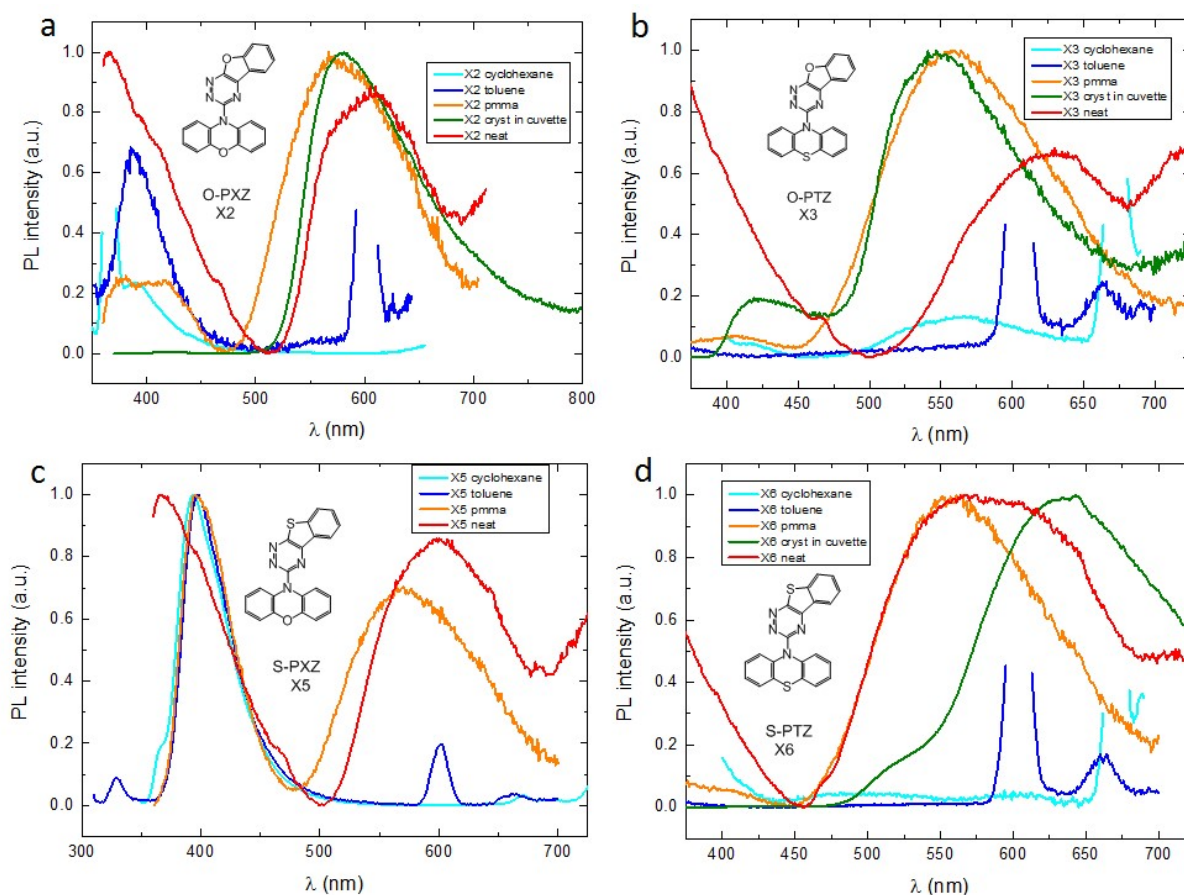

**Fig. S7** Emission spectra of (a) **X2**, (b) **X3**, (c) **X5** and (d) **X6** in cyclohexane ( $10^{-5}$  M, cyan), toluene ( $10^{-5}$  M, blue), PMMA (0.1wt%, orange), crystalline powder in cuvette (green, except c, no emission) and neat film (red).  $\lambda_{exc}$  = between 300-350 nm.

**Table S8:** QYs and decay times of **X2**, **X3**, **X5** and **X6** in solid state.

|           | QY<br>PMMA | QY cryst.<br>powd. | $\tau_{1,av.}$ (ns)<br>PMMA | $\tau_{2,av.}$ ( $\mu$ s)<br>PMMA | $\tau_{1,av.}$ (ns)<br>cryst. powd. | $\tau_{2,av.}$ ( $\mu$ s)<br>cryst. powd. |
|-----------|------------|--------------------|-----------------------------|-----------------------------------|-------------------------------------|-------------------------------------------|
| <b>X2</b> | §          | 0.5%               | 1.29                        | 9.29                              | 2.34                                | 0.2                                       |
| <b>X3</b> | 0.2%       | §                  | 1.20                        | 21.10                             | n.m.                                | n.m.                                      |
| <b>X5</b> | §          | n.e.               | 1.07                        | 11.16                             | n.e.                                | n.e.                                      |
| <b>X6</b> | 0.2%       | 0.5%               | 0.62                        | 14.45                             | 2.44                                | 0.84                                      |

§ = less than 0.05%

n.e= not emissive

n.m. = not measured

**Table S9:** Maximum absorption wavelengths for **X1-X7** in PMMA

| MOLECULE  | Absorption wavelength (nm)         |
|-----------|------------------------------------|
| <b>X1</b> | 412(s), 380, 324, 311, 297(s), 289 |
| <b>X2</b> | 425(s), 398,304                    |
| <b>X3</b> | 398, 286                           |
| <b>X4</b> | 423,392, 327, 313, 295(s), 290     |
| <b>X5</b> | 436, 409(s), 310, 283              |
| <b>X6</b> | 424, 301(s), 291                   |
| <b>X7</b> | 414, 383, 330, 316, 303, 293       |

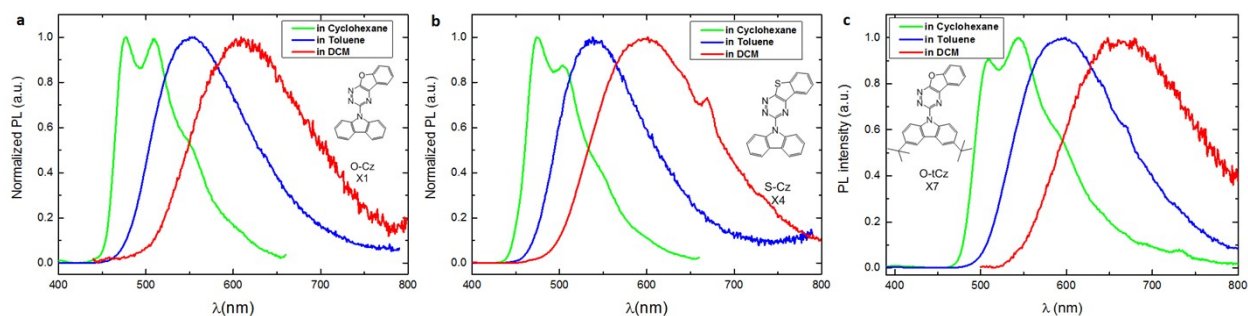**Fig. S8** Photoluminescence spectra of **X1** (a), **X4** (b) and **X7** (c) in cyclohexane ( $10^{-5}$  M, green), toluene ( $10^{-5}$  M, blue) and dichloromethane ( $10^{-5}$  M, red).  $\lambda_{\text{exc}}$  = between 325-330 nm.**Table S10:** Spectroscopic properties of **X1**, **X4** and **X7** in cyclohexane.

| Cyclohexane | QY (air) | QY(deg) | $\tau_{1,\text{av}}$ (ns) | $\tau_{2,\text{av}}$ ( $\mu\text{s}$ ) |
|-------------|----------|---------|---------------------------|----------------------------------------|
| <b>X1</b>   | 0.20%    | 0.20%   | 0.4                       | 1.85                                   |
| <b>X4</b>   | 0.08%    | 0.09%   | 0.26                      | 1.64                                   |
| <b>X7</b>   | 0.60%    | 0.60%   | 1.70                      | 6.97                                   |

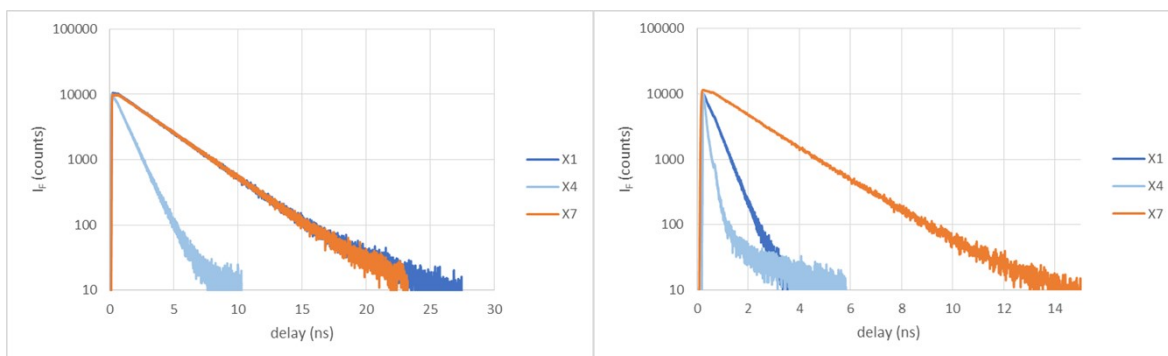

**Fig. S9** Fluorescence decays (ns regime) of **X1**(dark blue), **X4** (light blue) and **X7** (orange) in toluene (left) and cyclohexane (right).

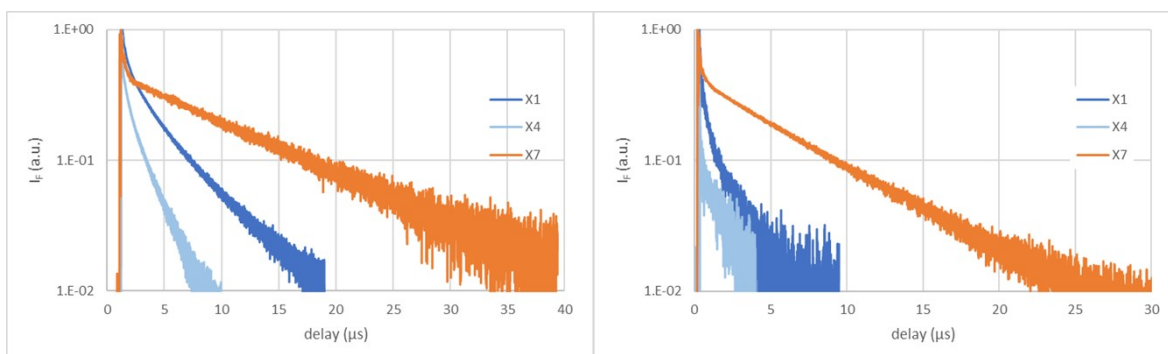

**Fig. S10** Fluorescence decays ( $\mu$ s regime) of **X1**(dark blue), **X4** (light blue) and **X7** (orange) in toluene (left) and cyclohexane (right). Decays were recorded in the absence of oxygen.

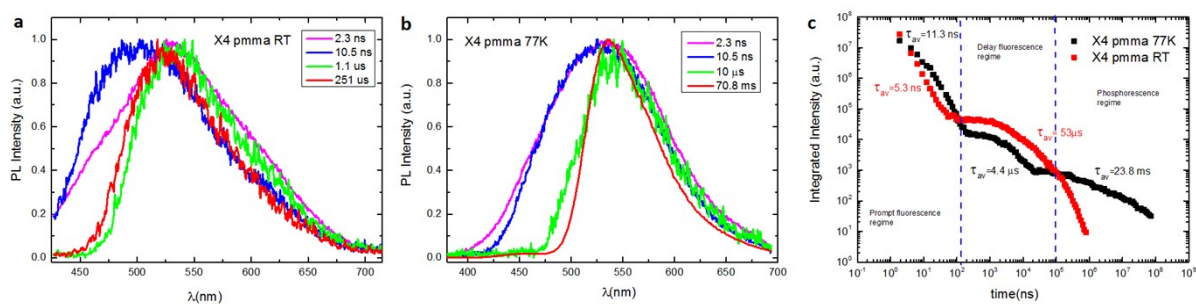

**Fig. S11** Time-resolved emission spectra at increasing delay times for **X4** at 0.1wt% PMMA films at 77K (left) and room temperature (center) and corresponding decay curves at room temperature and 77K (right).

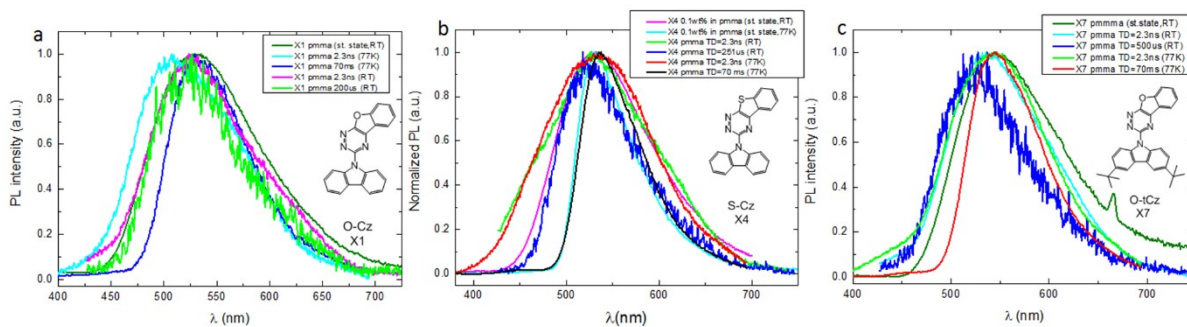

**Fig. S12:** PMMA steady state (st) and time-resolved emission spectra of **X1** (a), **X4** (b) and **X7** (c) at room temperature and 77K and at various delay times after excitation.

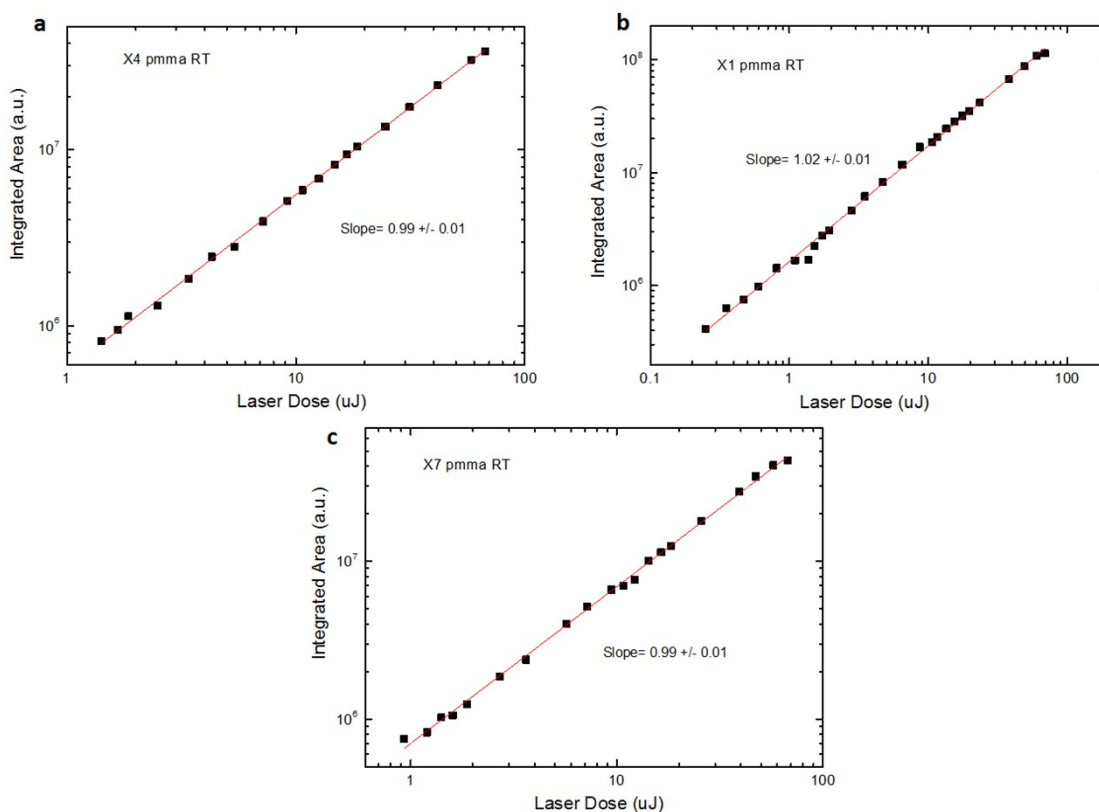

**Fig. S13** Power dependence of the integrated delayed fluorescence in PMMA thin films of **X1** (a), **X4** (b) and **X7** (c) at RT.

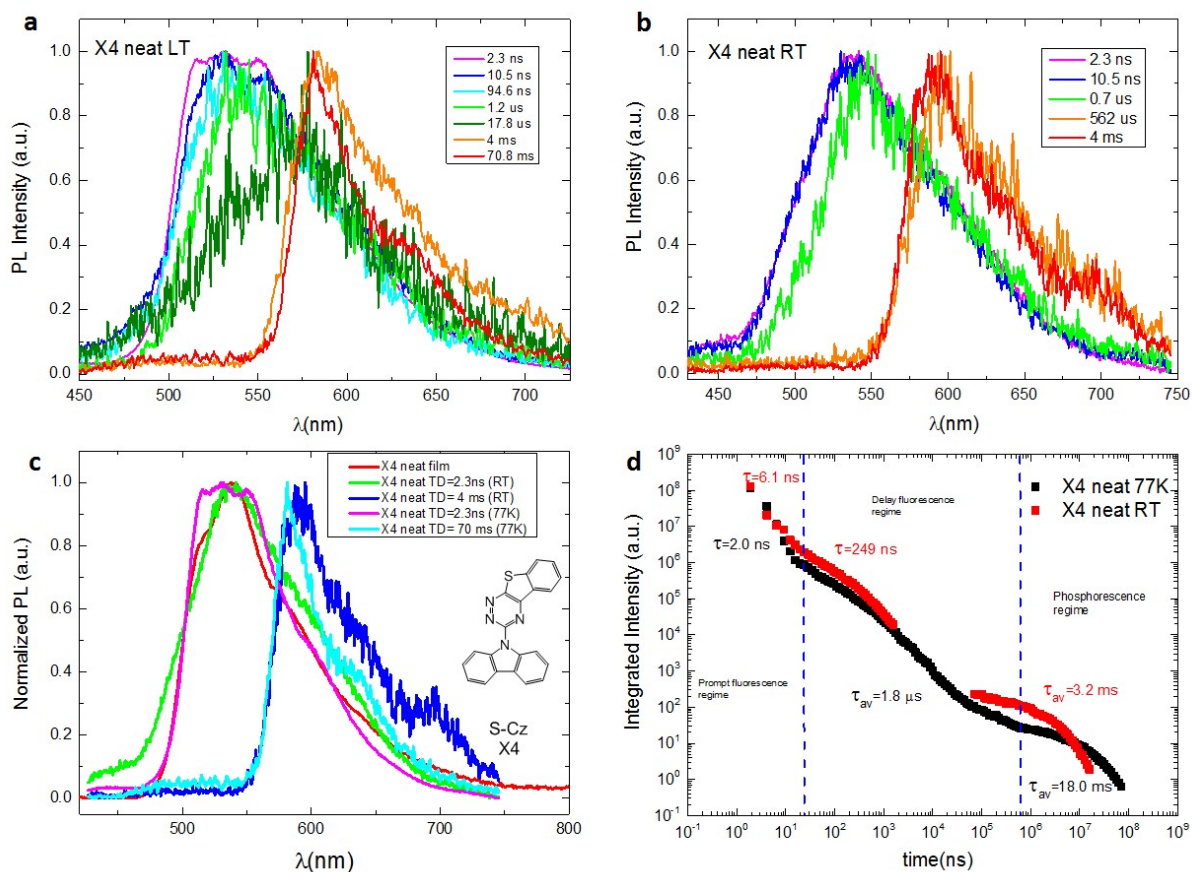

**Fig. S14** Time-resolved emission spectra and decay of **X4** in neat films: (a) 77K time-resolved spectra at increasing delay times, (b) room temperature time-resolved spectra at increasing delay times, (c) comparison of steady state (st) and time-resolved emission spectra at 77K and room temperature, and (d) decay curves at room temperature and 77K.

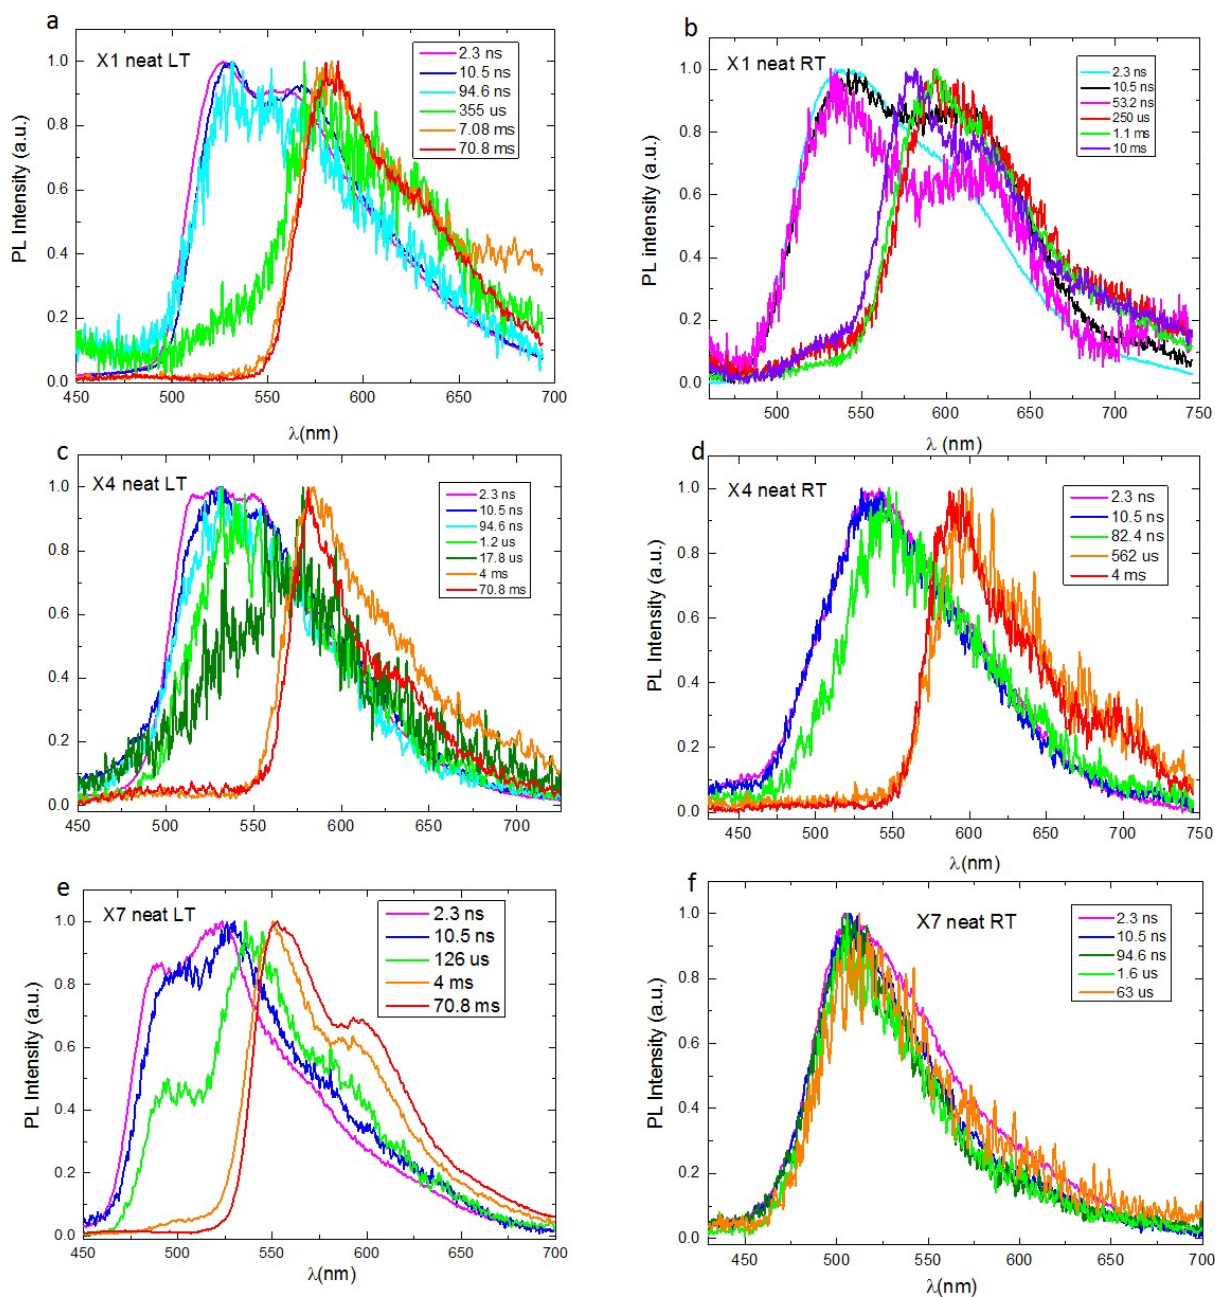

**Fig. S15** Time-resolved emission spectra at increasing delay times for X1 (a,b), X4 (c,d) and X7 (e,f) in neat films at 77K (LT, left) and room temperature (RT, right).

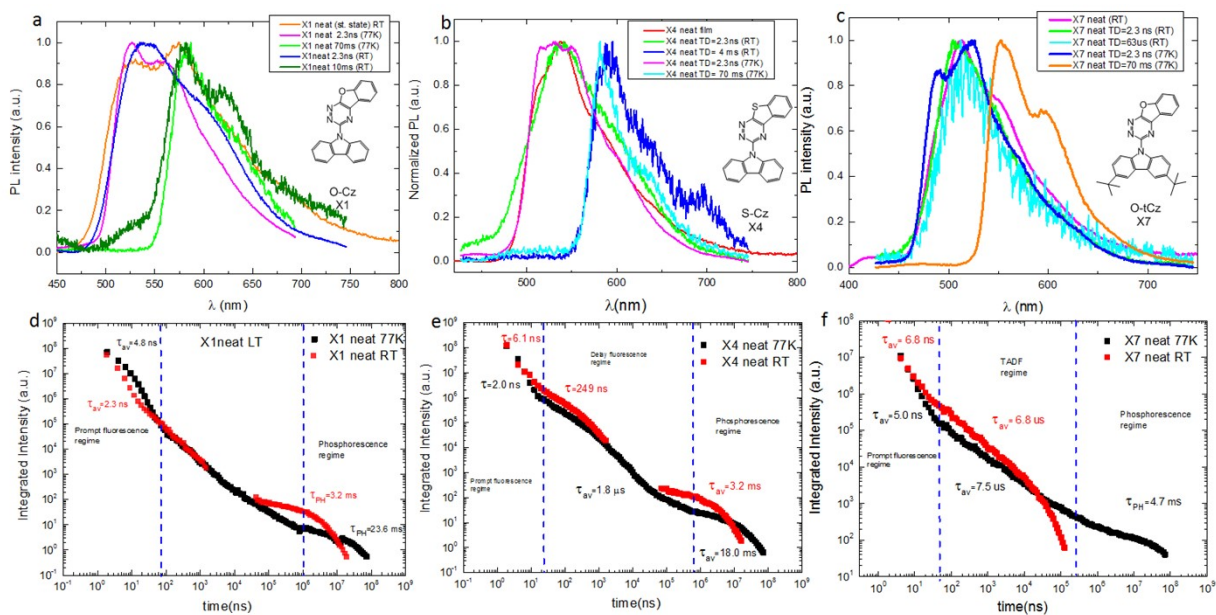

**Figure S16:** Top: steady state (st) and time-resolved emission spectra in crystalline films at room temperature and 77K and at various delayed time after excitation of **X1** (a), **X4** (b) and **X7** (c). Bottom: corresponding decay curves at room temperature and 77K.

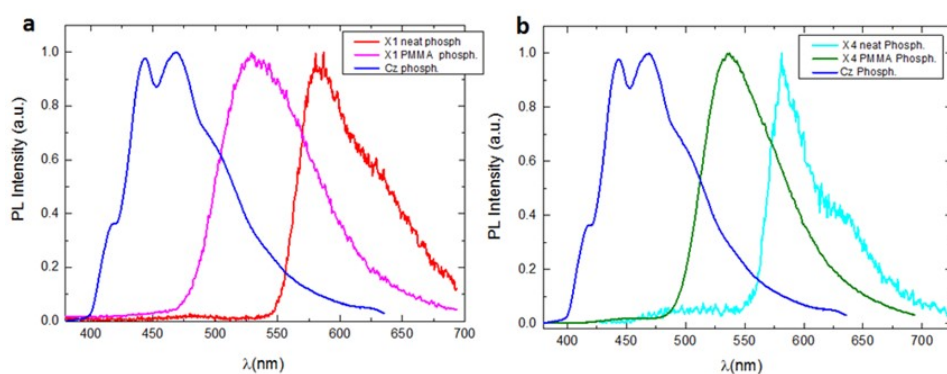

**Figure S17:** Comparison of Phosphorescence (77K) spectra in neat film and PMMA with the phosphorescence of carbazole of **X1** (a) and **X4** (b).

## 7. NMR and MS spectra

**5a**  $^1\text{H}$  NMR ( $\text{CDCl}_3$ )

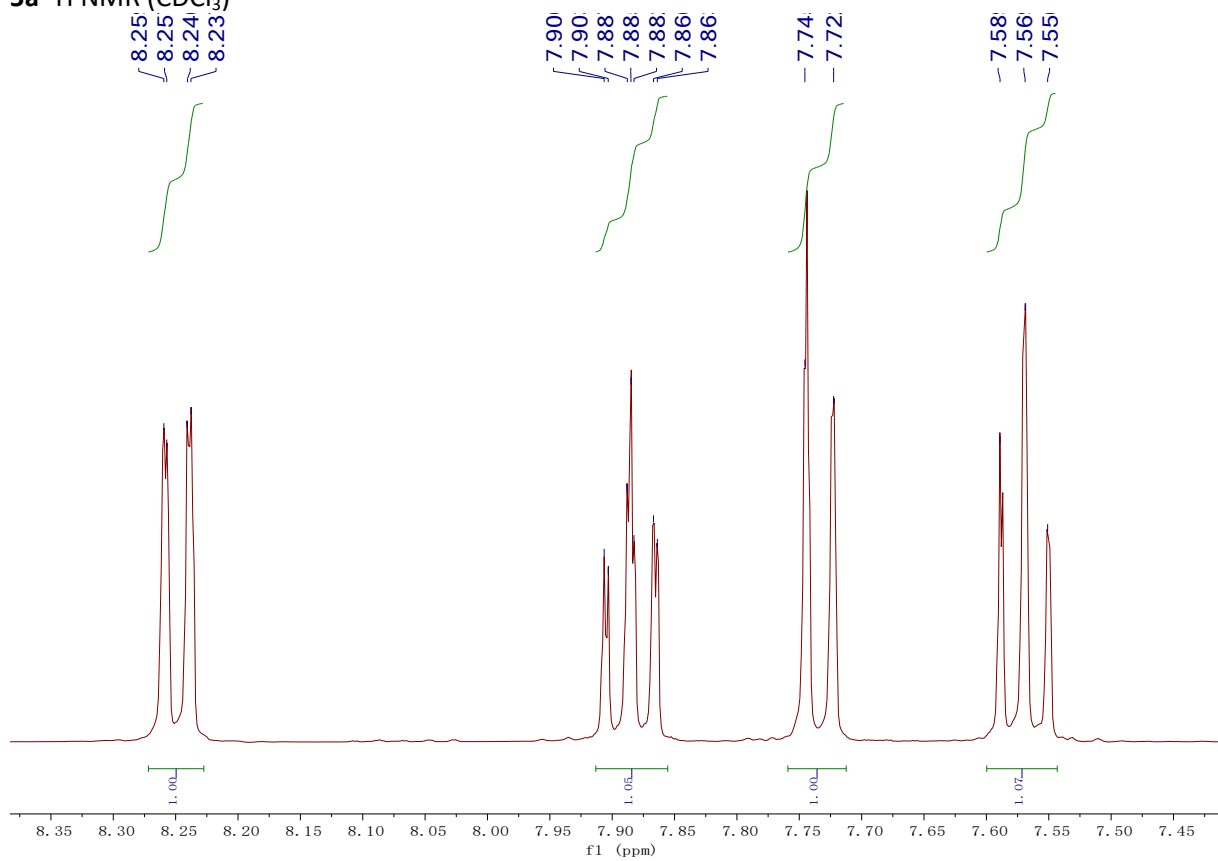

**5a**  $^{13}\text{C}$  NMR ( $\text{CDCl}_3$ )



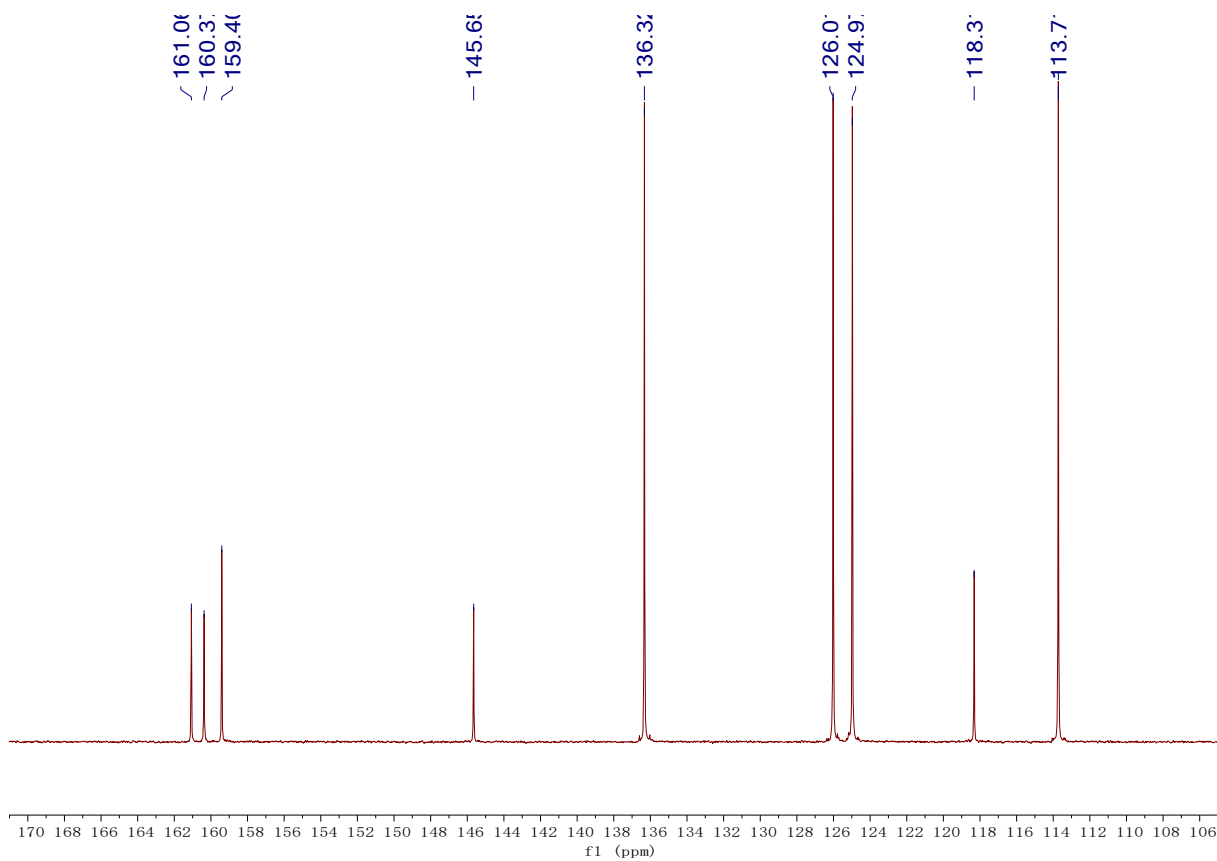

**5b** <sup>1</sup>H NMR (CDCl<sub>3</sub>)

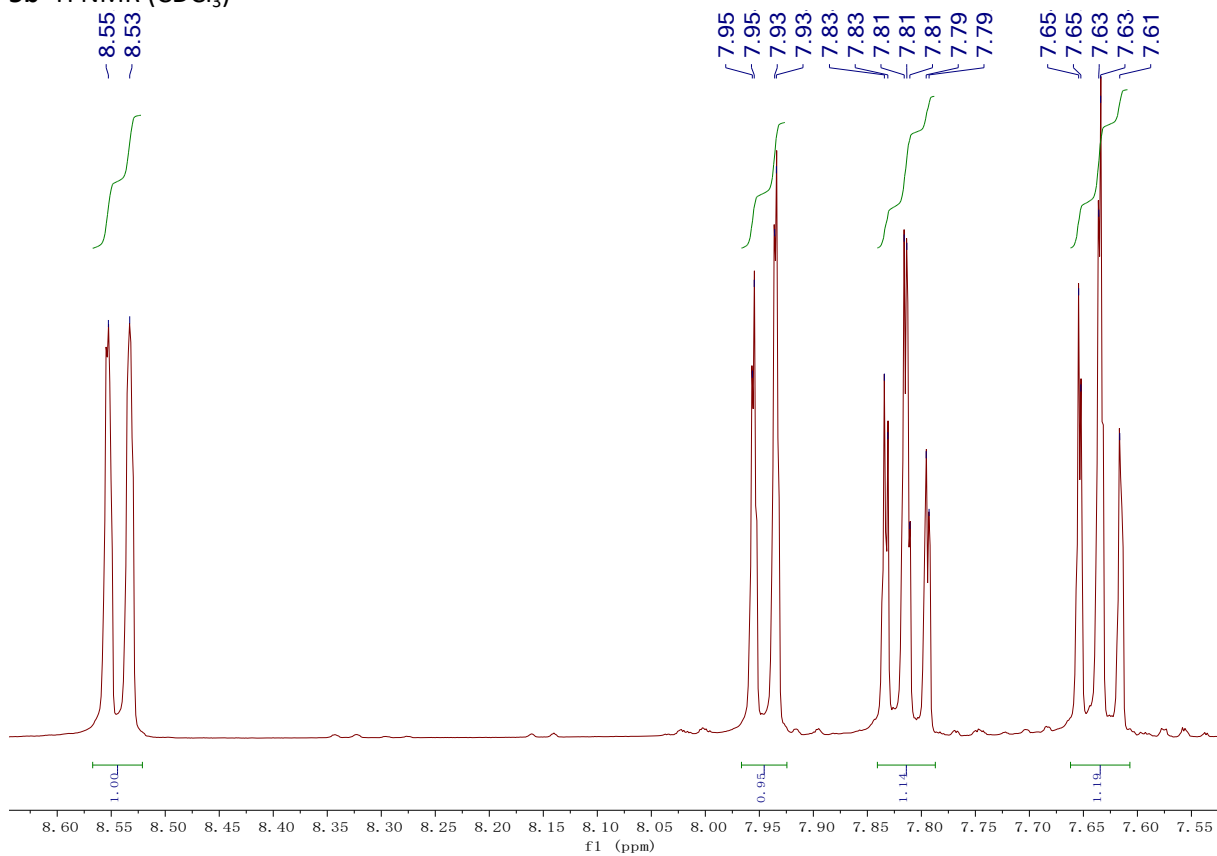

**5b**  $^{13}\text{C}$  NMR ( $\text{CDCl}_3$ )

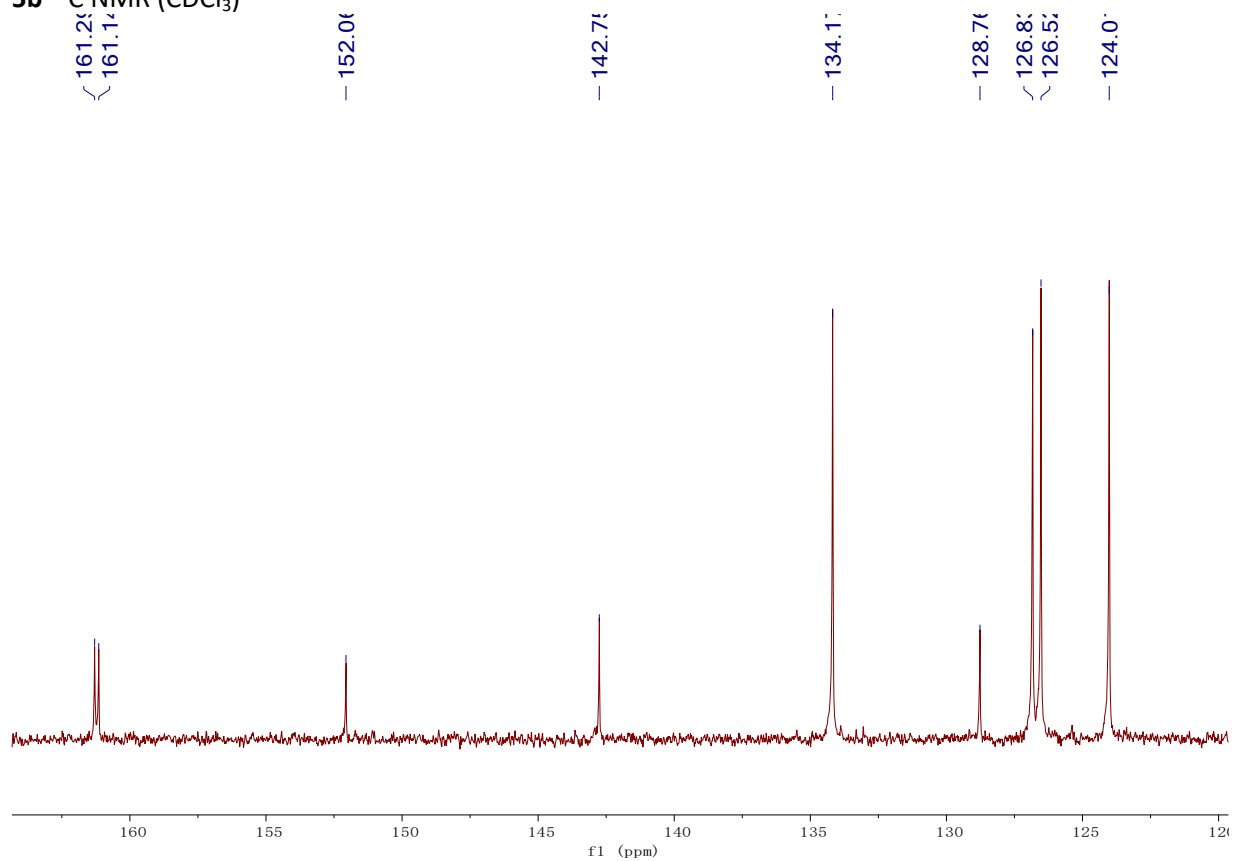

**X1**  $^1\text{H}$  NMR ( $\text{CDCl}_3$ )

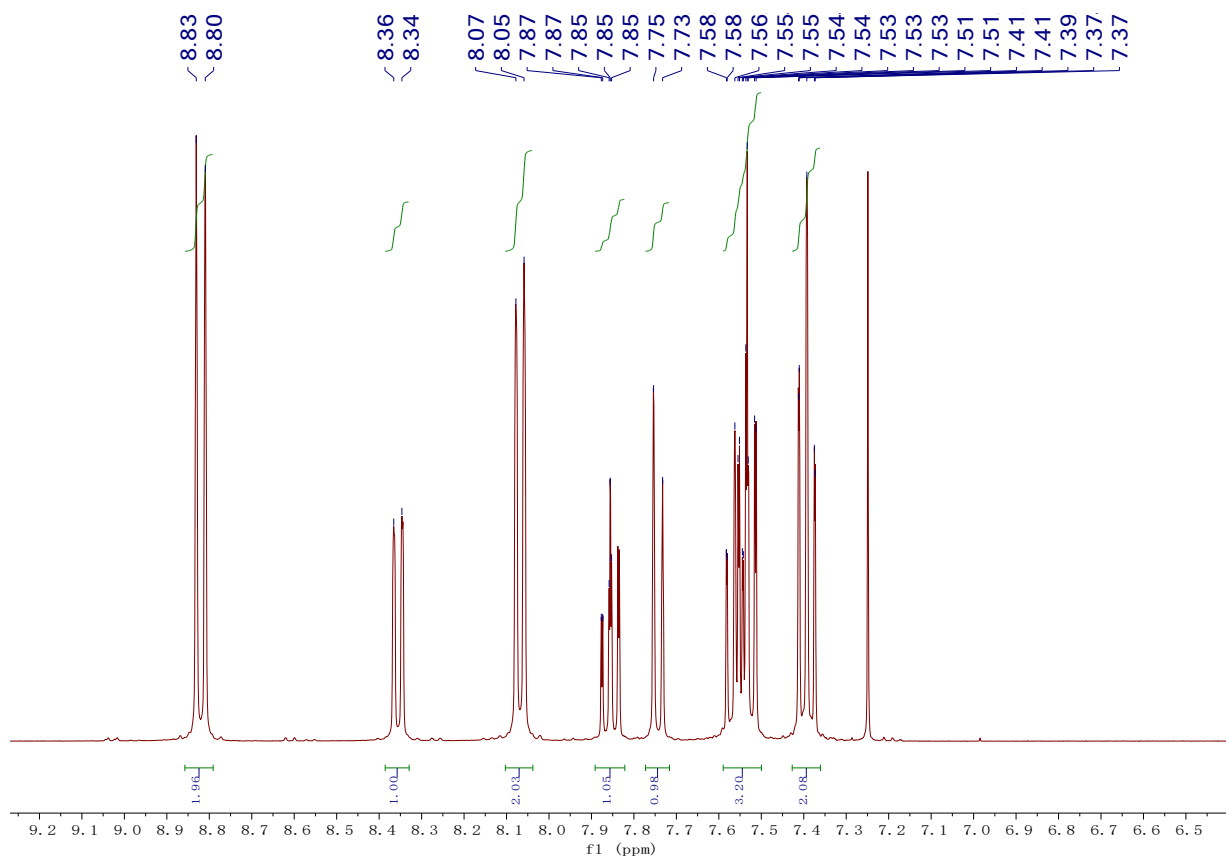

**X1**  $^{13}\text{C}$  NMR ( $\text{CDCl}_3$ )

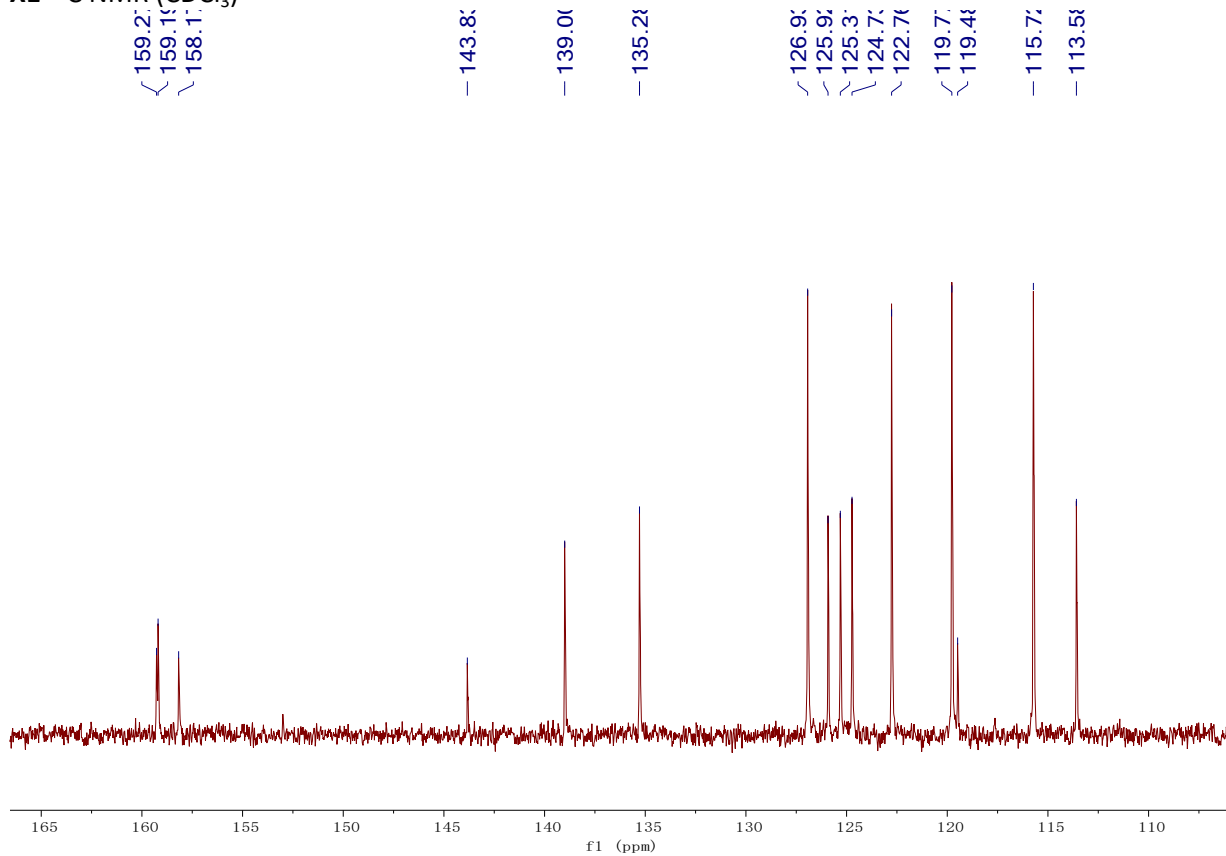

### X1 EI HRMS

Monoisotopic Mass, Even Electron Ions

422 formula(e) evaluated with 3 results within limits (all results (up to 1000) for each mass)

Elements Used:

C: 1-120 H: 1-150 N: 0-10 O: 0-10

PPSM\_X1 21 (0.572) Cm (17:30)

1: TOF MS ES+

7.28e+004

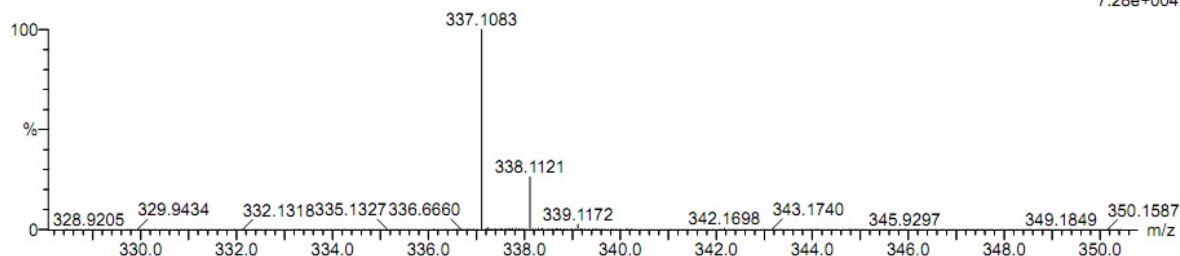

Minimum: -1.5  
Maximum: 5.0 5.0 100.0

| Mass     | Calc. Mass | mDa  | PPM  | DBE  | i-FIT  | i-FIT (Norm) | Formula       |
|----------|------------|------|------|------|--------|--------------|---------------|
| 337.1083 | 337.1089   | -0.6 | -1.8 | 17.5 | 1365.1 | 0.1          | C21 H13 N4 O  |
|          | 337.1076   | 0.7  | 2.1  | 12.5 | 1367.5 | 2.4          | C20 H17 O5    |
|          | 337.1068   | 1.5  | 4.4  | 0.5  | 1379.8 | 14.7         | C4 H17 N8 O10 |

### X2 <sup>1</sup>H NMR (CDCl<sub>3</sub>)

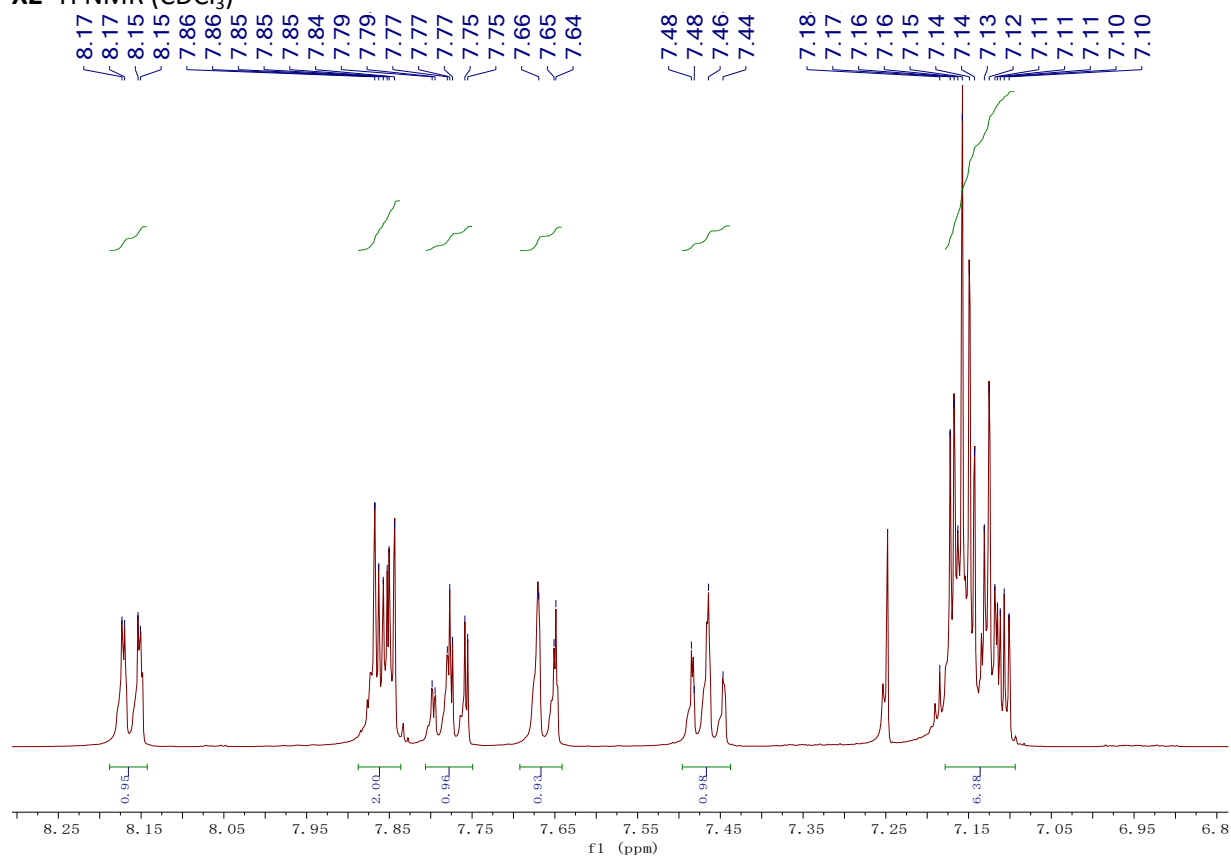

### X2 <sup>13</sup>C NMR (CDCl<sub>3</sub>)

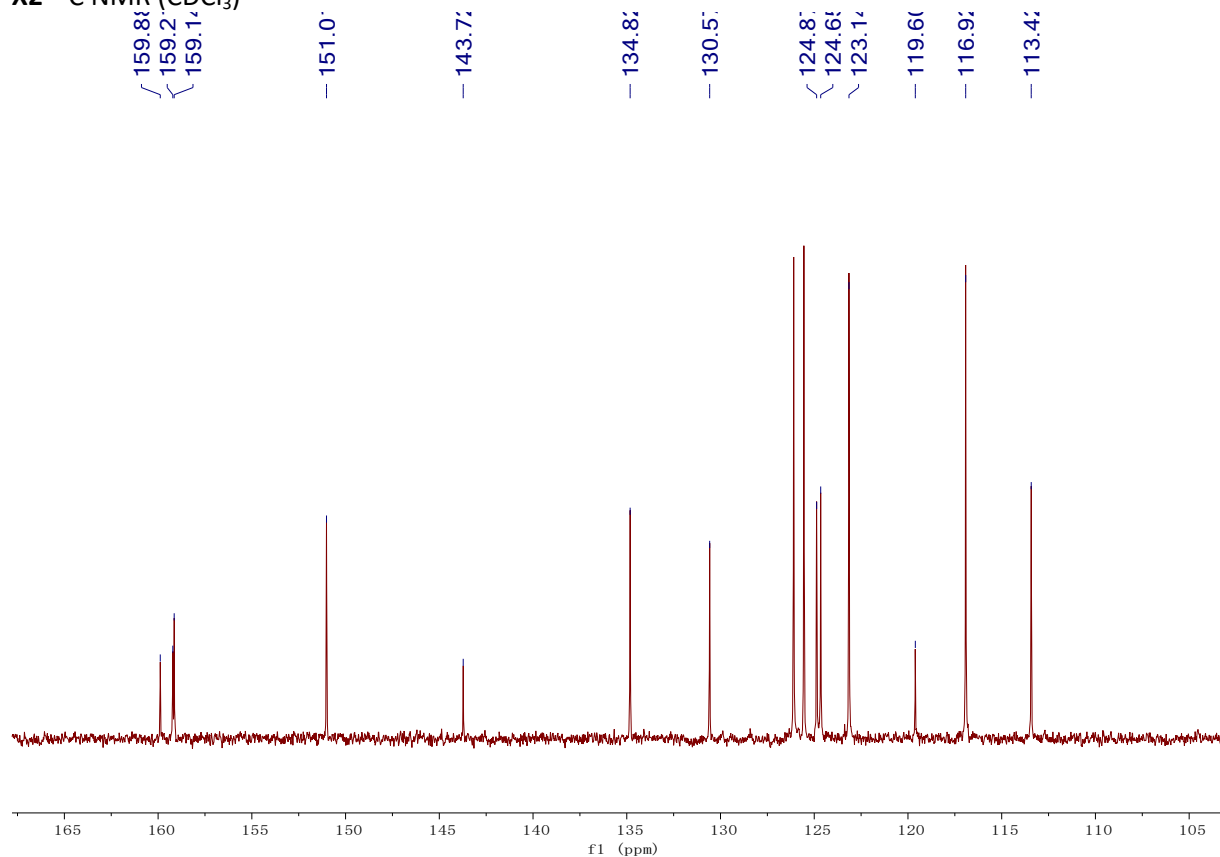

### X2 EI HRMS

Monoisotopic Mass, Even Electron Ions  
 446 formula(e) evaluated with 2 results within limits (all results (up to 1000) for each mass)  
 Elements Used:  
 C: 1-120 H: 1-150 N: 0-10 O: 0-10  
 PPSM\_X2 37 (0.934) Cm (37:49)  
 1: TOF MS ES+

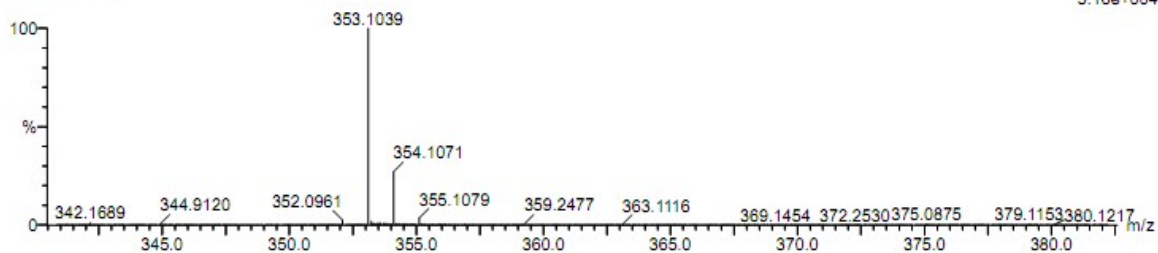

| Mass     | Calc. Mass | mDa | PPM | DBE  | i-FIT  | i-FIT (Norm) | Formula       |
|----------|------------|-----|-----|------|--------|--------------|---------------|
| 353.1039 | 353.1039   | 0.0 | 0.0 | 17.5 | 1199.2 | 0.0          | C21 H13 N4 O2 |
|          | 353.1025   | 1.4 | 4.0 | 12.5 | 1204.3 | 5.1          | C20 H17 O6    |

**X3** <sup>1</sup>H NMR (CDCl<sub>3</sub>)

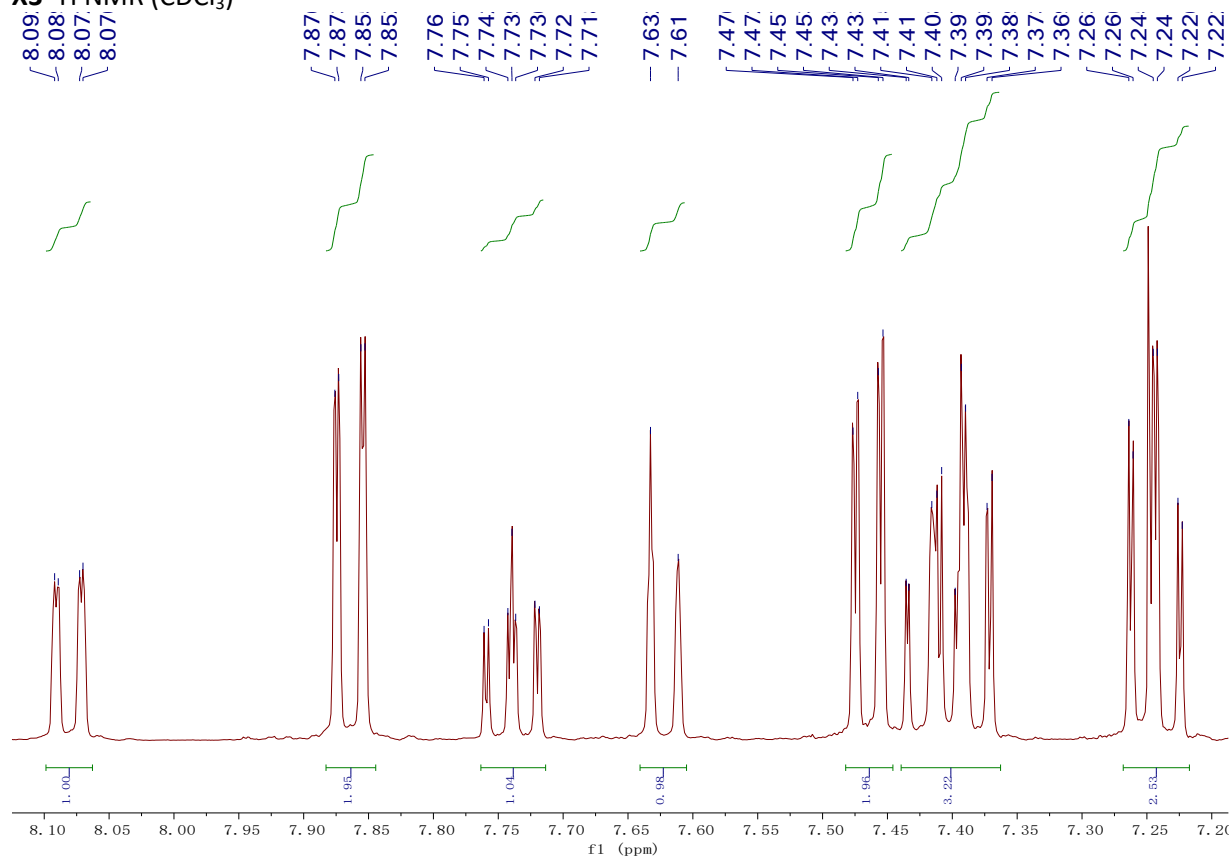

**X3** <sup>13</sup>C NMR (CDCl<sub>3</sub>)

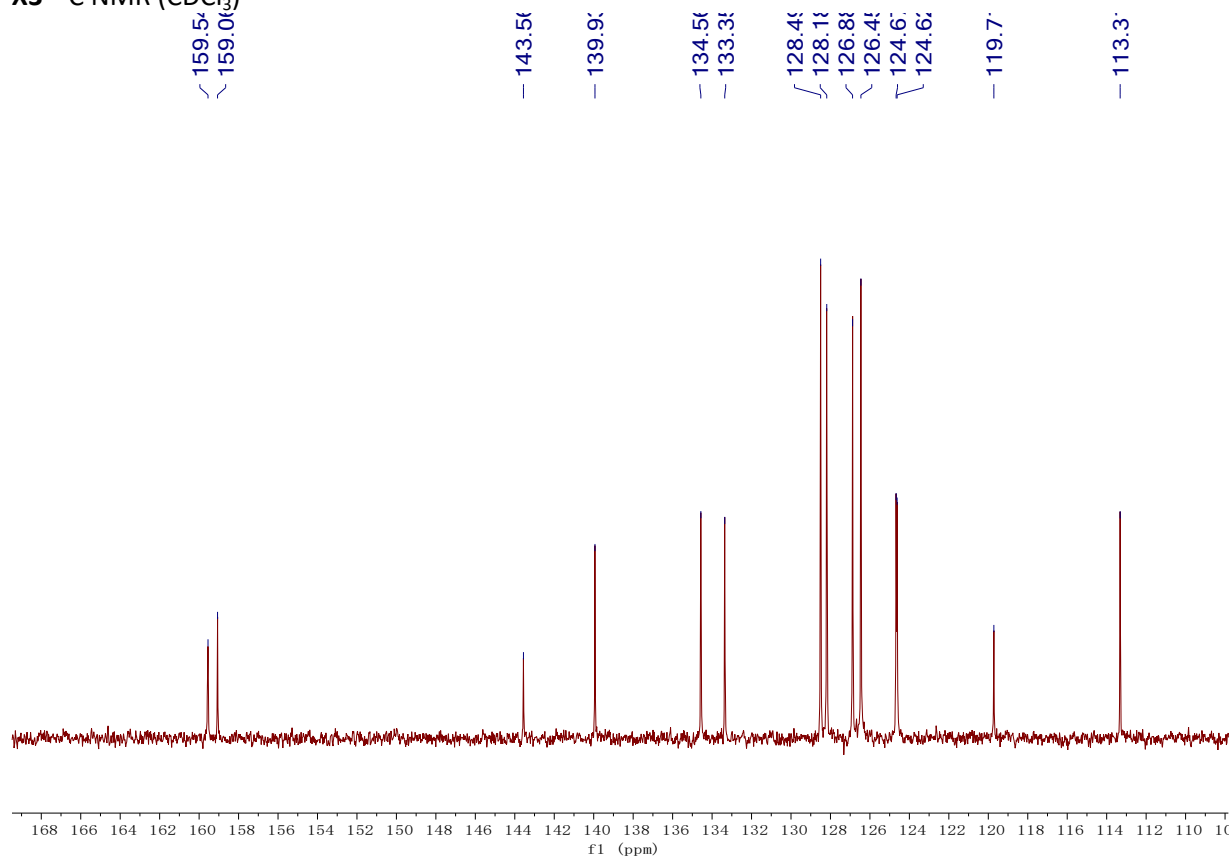

### X3 EI HRMS

Monoisotopic Mass, Even Electron Ions

422 formula(e) evaluated with 3 results within limits (all results (up to 1000) for each mass)

Elements Used:

C: 1-120 H: 1-150 N: 0-10 O: 0-10 S: 1-1

PPSM\_X3 21 (0.572) Cm (19:26)

1: TOF MS ES+

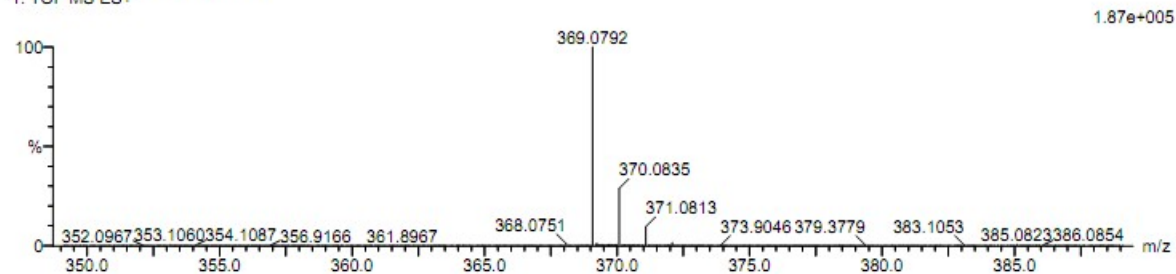

Minimum: -1.5  
Maximum: 100.0

| Mass     | Calc. Mass | mDa  | PPM  | DBE  | i-FIT  | i-FIT (Norm) | Formula         |
|----------|------------|------|------|------|--------|--------------|-----------------|
| 369.0792 | 369.0810   | -1.8 | -4.9 | 17.5 | 1449.4 | 0.1          | C21 H13 N4 O S  |
|          | 369.0797   | -0.5 | -1.4 | 12.5 | 1451.7 | 2.4          | C20 H17 O5 S    |
|          | 369.0788   | 0.4  | 1.1  | 0.5  | 1469.3 | 20.0         | C4 H17 N8 O10 S |

### X4 <sup>1</sup>H NMR (CDCl<sub>3</sub>)

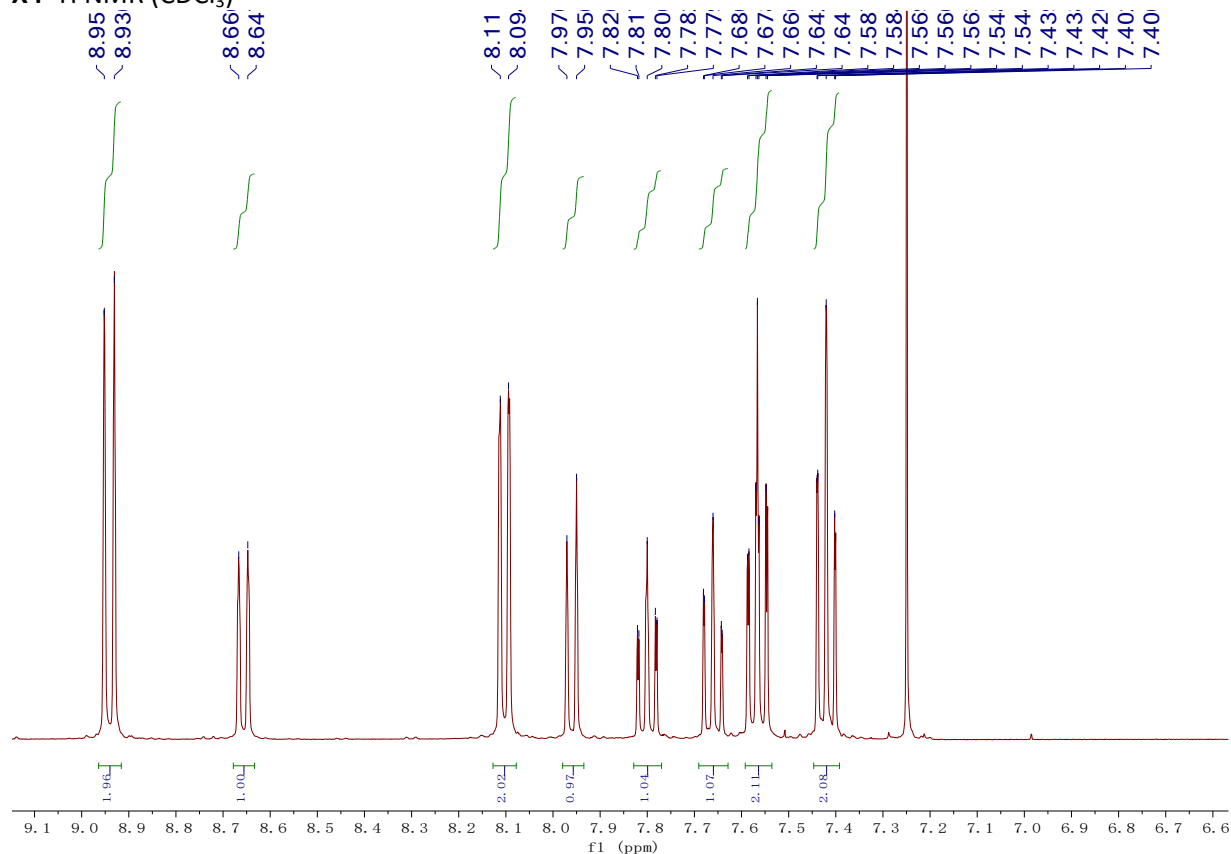

**X4 <sup>13</sup>C NMR (CDCl<sub>3</sub>)**

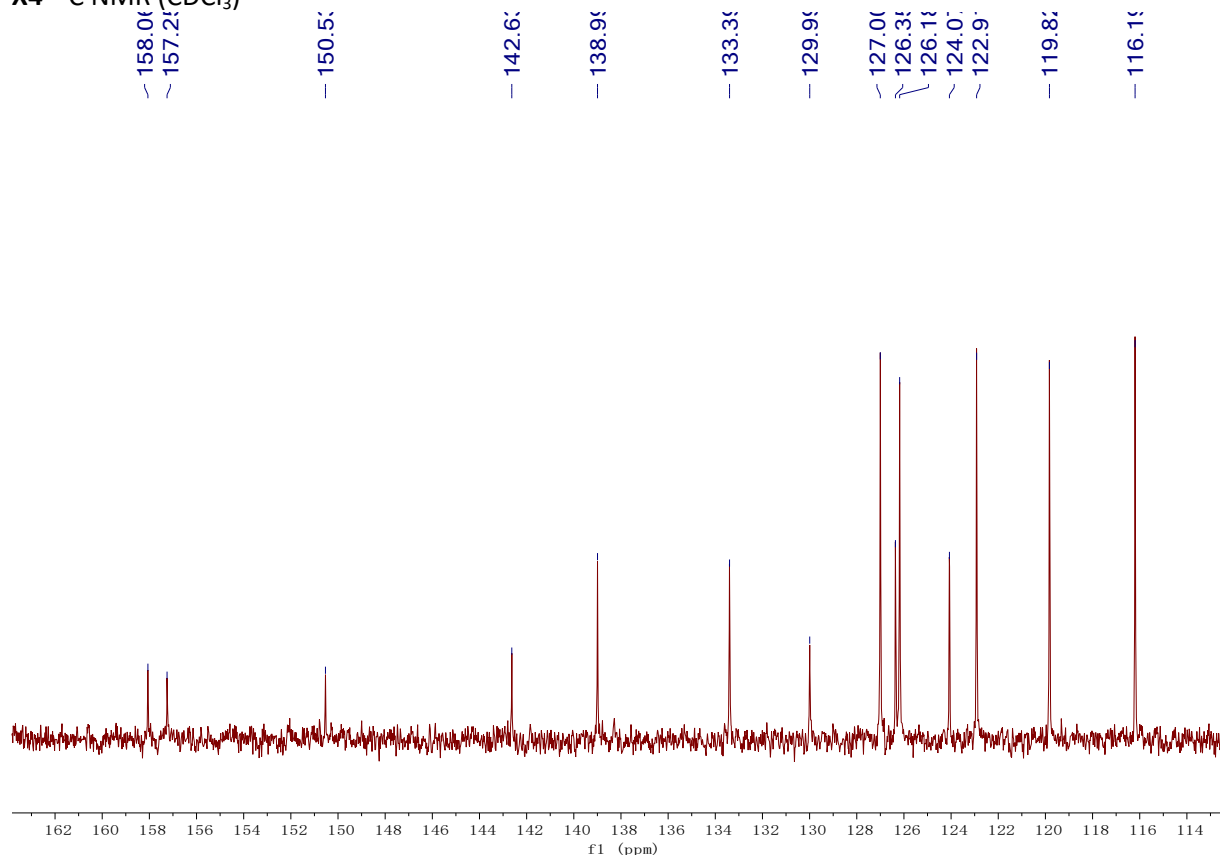

**X4 EI HRMS**

Monoisotopic Mass, Even Electron Ions  
 396 formula(e) evaluated with 3 results within limits (all results (up to 1000) for each mass)  
 Elements Used:  
 C: 1-120 H: 1-150 N: 0-10 O: 0-10 S: 1-1  
 PPSM\_X4 22 (0.589) Cm (18:30)  
 1: TOF MS ES+

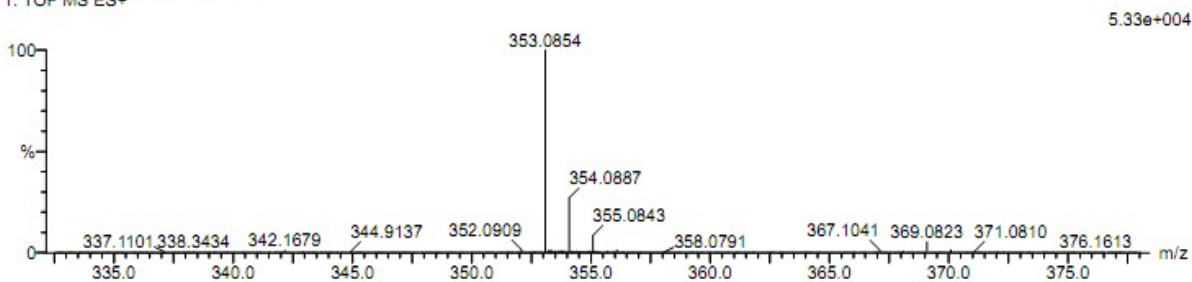

| Mass     | Calc. Mass | mDa  | PPM  | DBE  | i-FIT  | i-FIT (Norm) | Formula        |
|----------|------------|------|------|------|--------|--------------|----------------|
| 353.0854 | 353.0861   | -0.7 | -2.0 | 17.5 | 1271.5 | 0.0          | C21 H13 N4 S   |
|          | 353.0848   | 0.6  | 1.7  | 12.5 | 1276.3 | 4.9          | C20 H17 O4 S   |
|          | 353.0839   | 1.5  | 4.2  | 0.5  | 1292.6 | 21.1         | C4 H17 N8 O9 S |



X5 <sup>1</sup>H NMR (CDCl<sub>3</sub>)

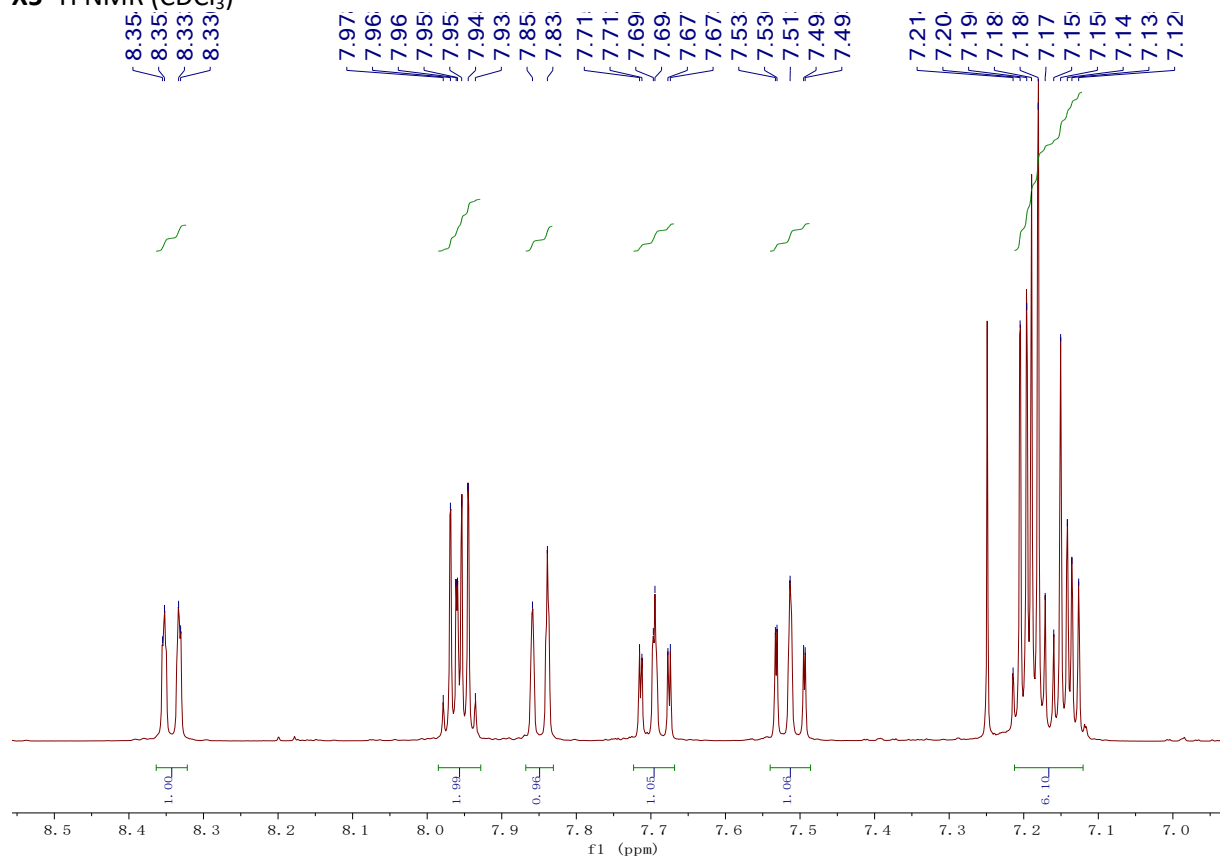

X5 <sup>13</sup>C NMR (CDCl<sub>3</sub>)

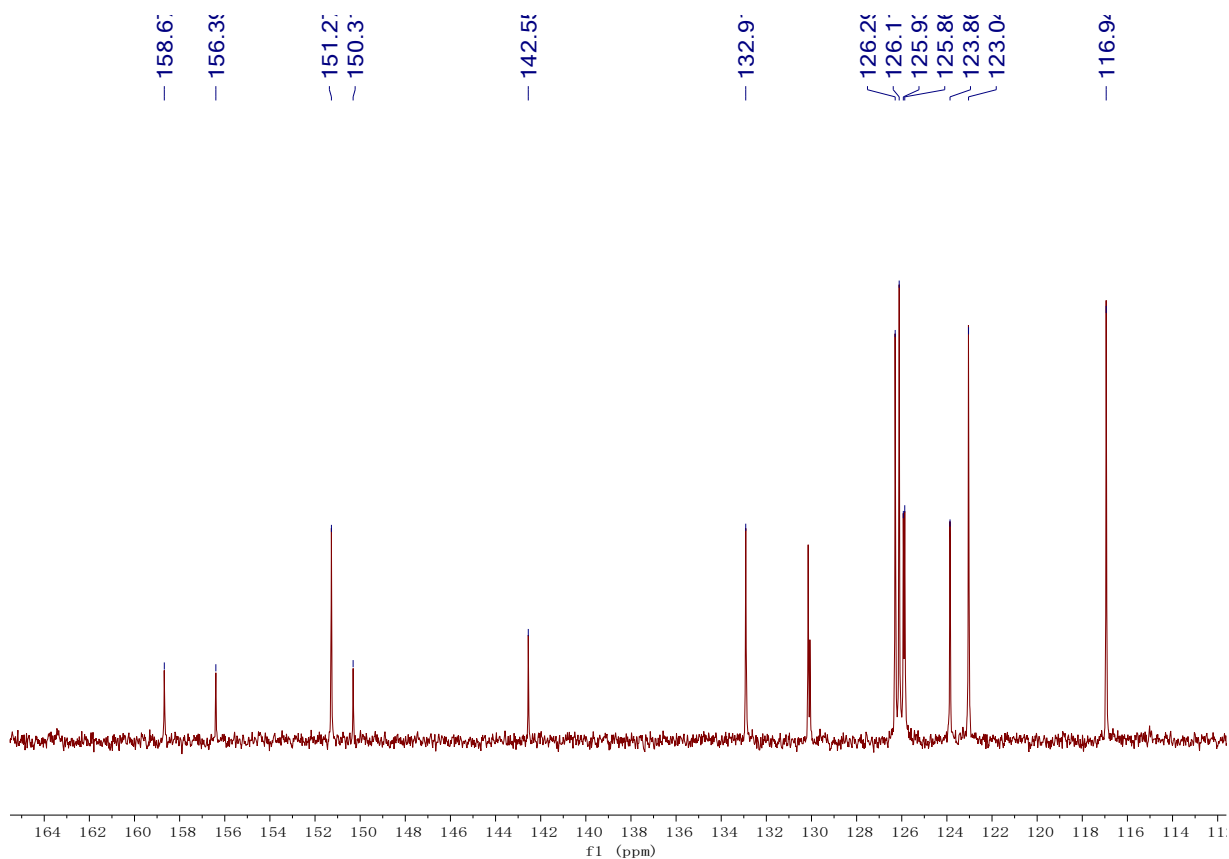

### X5 EI HRMS

Monoisotopic Mass, Even Electron Ions

422 formula(e) evaluated with 2 results within limits (all results (up to 1000) for each mass)

Elements Used:

C: 1-120 H: 1-150 N: 0-10 O: 0-10 S: 1-1

PPSM\_X5 25 (0.663) Cm (20:27)

1: TOF MS ES+

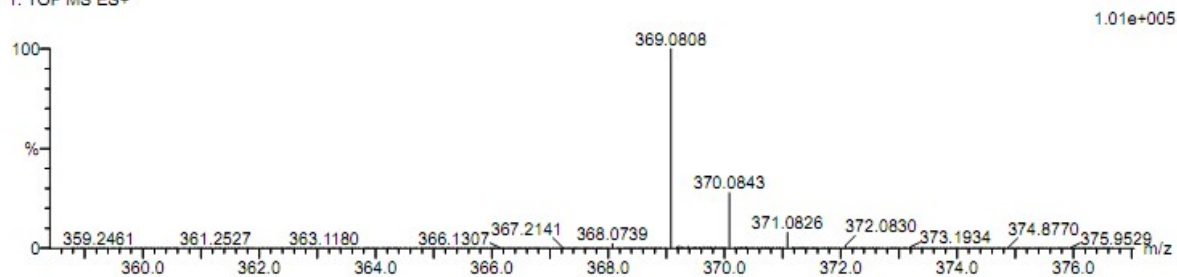

Minimum: -1.5  
Maximum: 5.0 5.0 100.0

| Mass     | Calc. Mass | mDa  | PPM  | DBE  | i-FIT  | i-FIT (Norm) | Formula        |
|----------|------------|------|------|------|--------|--------------|----------------|
| 369.0808 | 369.0810   | -0.2 | -0.5 | 17.5 | 1274.3 | 0.0          | C21 H13 N4 O S |
|          | 369.0797   | 1.1  | 3.0  | 12.5 | 1279.5 | 5.2          | C20 H17 O5 S   |

### X6 1H NMR (CDCl3)

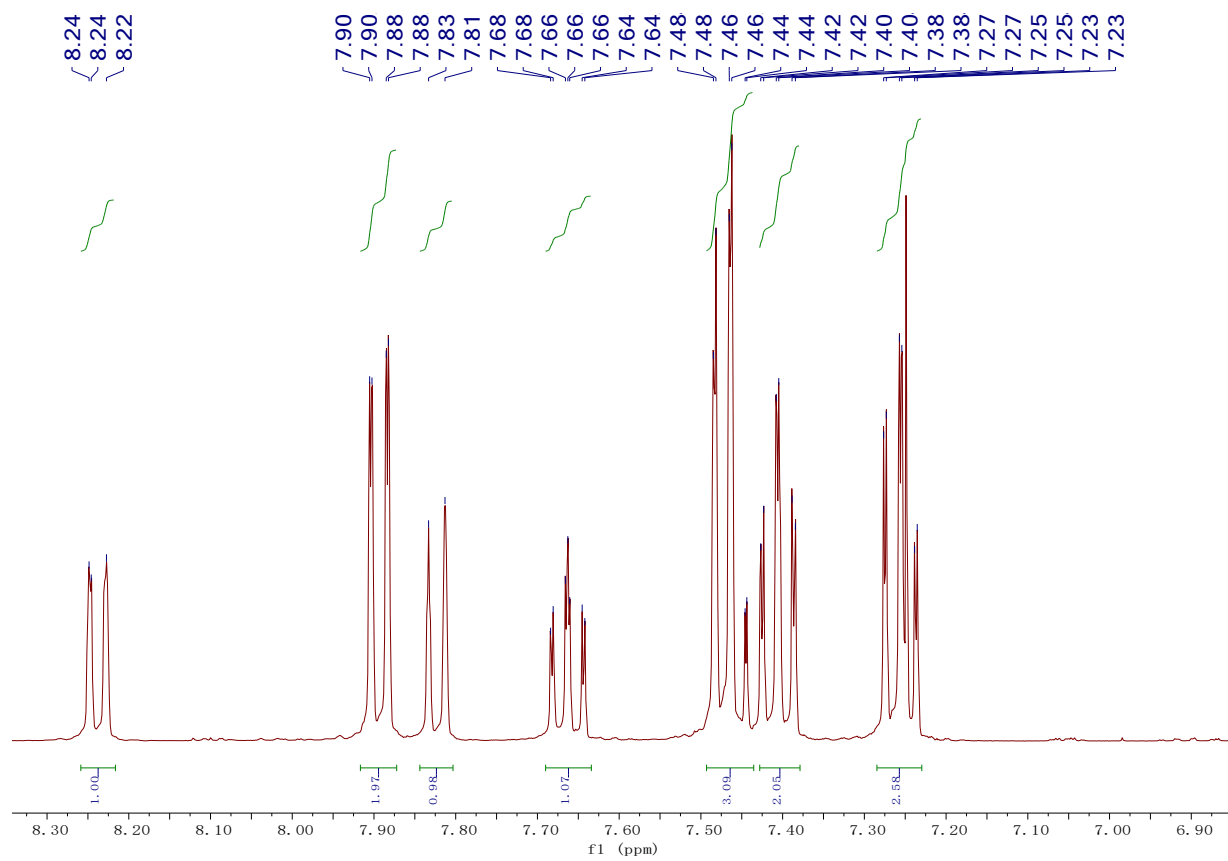

### X6 <sup>13</sup>C NMR (CDCl<sub>3</sub>)

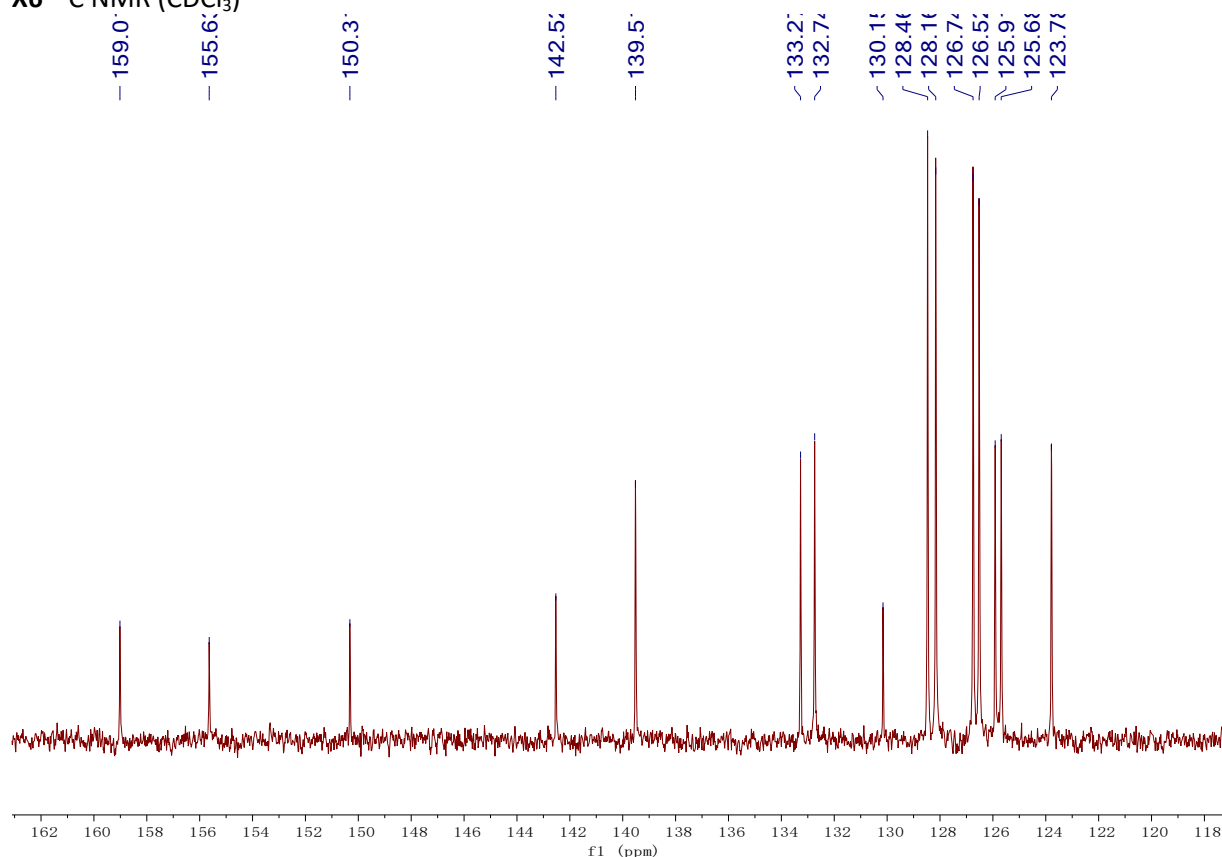

### X6 EI HRMS

Monoisotopic Mass, Even Electron Ions  
 395 formula(e) evaluated with 3 results within limits (all results (up to 1000) for each mass)  
 Elements Used:  
 C: 1-120 H: 1-150 N: 0-10 O: 0-10 S: 2-2  
 PPSM X8 19 (0.517) Cm (17.28)  
 1: TOF MS ES+

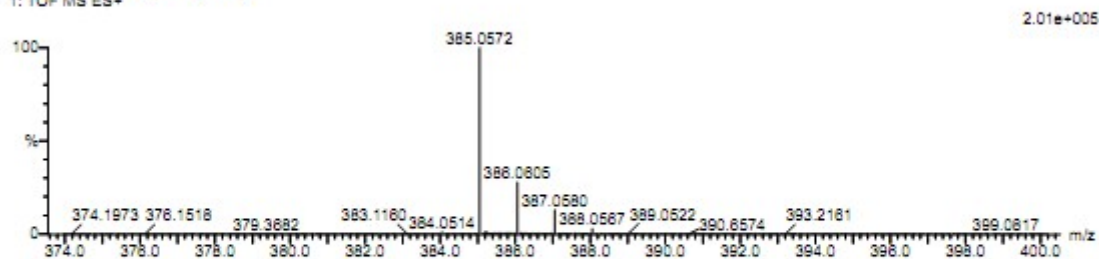

Minimum: -1.5  
 Maximum: 5.0 5.0 100.0

| Mass     | Calc. Mass | mDa  | PPM  | DBE  | i-FIT  | i-FIT (Norm) | Formula         |
|----------|------------|------|------|------|--------|--------------|-----------------|
| 385.0572 | 385.0582   | -1.0 | -2.6 | 17.5 | 1573.8 | 0.0          | C21 H13 N4 S2   |
|          | 385.0568   | 0.4  | 1.0  | 12.5 | 1582.6 | 8.8          | C20 H17 O4 S2   |
|          | 385.0560   | 1.2  | 3.1  | 0.5  | 1601.2 | 27.4         | C4 H17 N8 O9 S2 |

### X7 <sup>1</sup>H NMR (CDCl<sub>3</sub>)

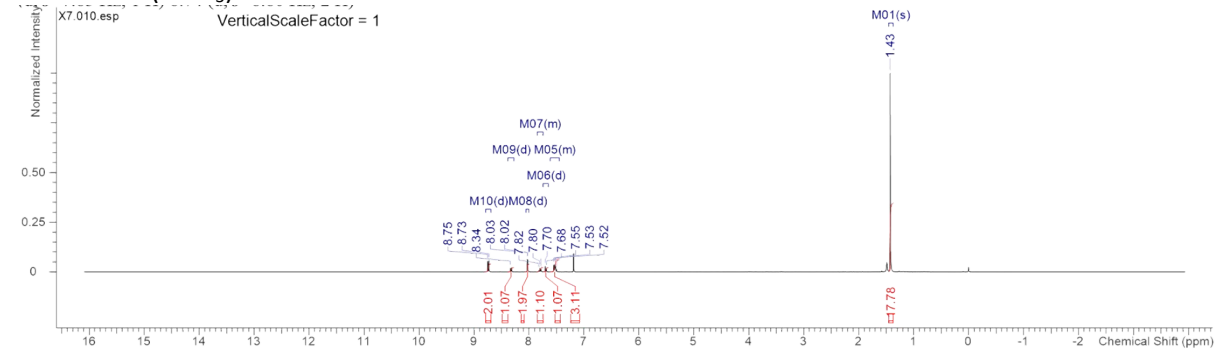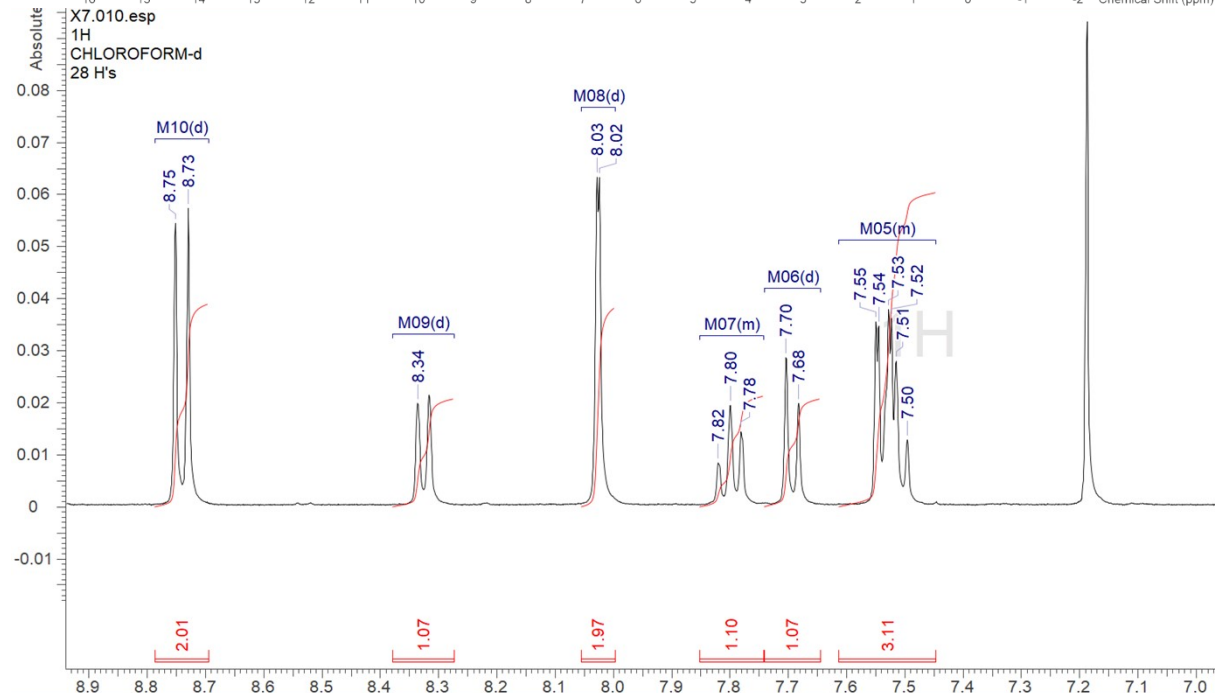

### X7 <sup>13</sup>C NMR (CDCl<sub>3</sub>)

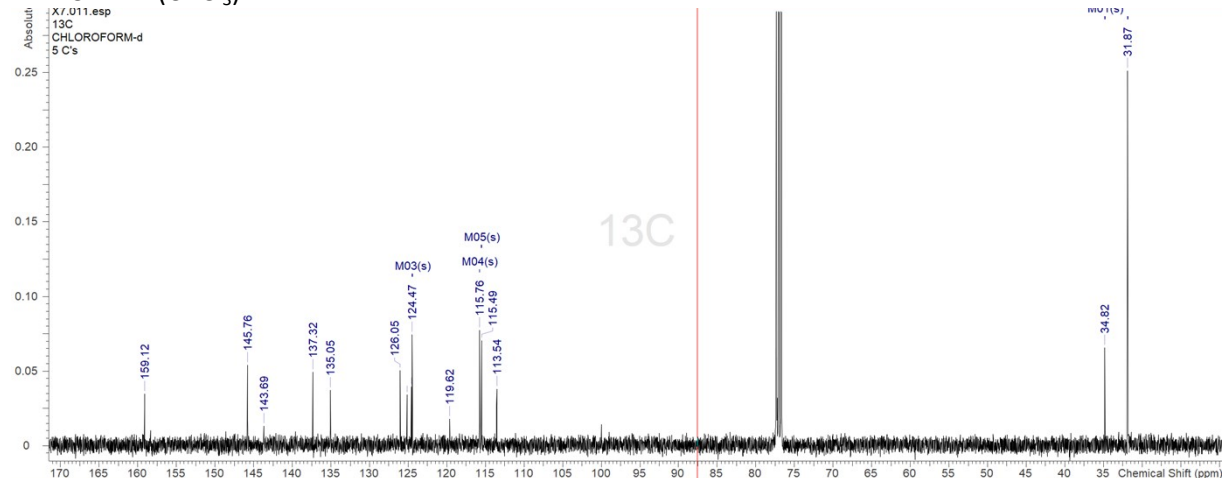

# X7 EI HRMS

Monoisotopic Mass, Even Electron Ions  
 583 formula(e) evaluated with 4 results within limits (all results (up to 1000) for each mass)  
 Elements Used:  
 C: 1-120 H: 1-150 N: 0-10 O: 0-10  
 PPSM X7 30(0.771) Cm (30:41)  
 1: TOF MS ES+

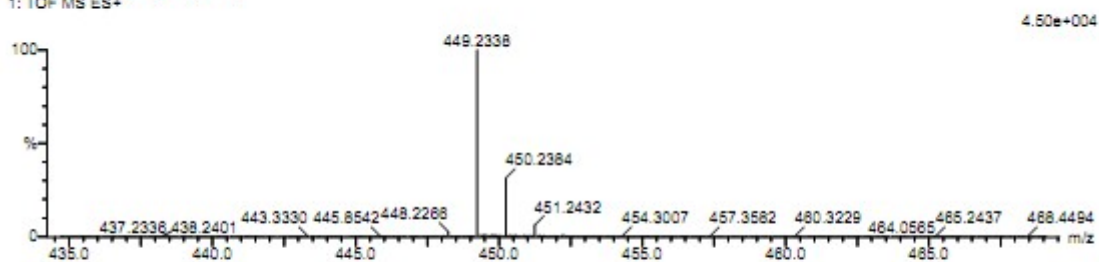

Minimum: -1.5  
 Maximum: 5.0 5.0 100.0

| Mass     | Calc. Mass | mDa  | PPM  | DBE  | i-FIT  | i-FIT (Norm) | Formula        |
|----------|------------|------|------|------|--------|--------------|----------------|
| 449.2338 | 449.2328   | 1.0  | 2.2  | 12.5 | 1140.3 | 0.0          | C28 H33 O5     |
|          | 449.2341   | -0.3 | -0.7 | 17.5 | 1143.7 | 3.5          | C29 H29 N4 O   |
|          | 449.2360   | -2.2 | -4.9 | 4.5  | 1155.3 | 15.1         | C17 H33 N6 O8  |
|          | 449.2320   | 1.8  | 4.0  | 0.5  | 1161.1 | 20.9         | C12 H33 N8 O10 |

## 8. Geometries of the calculated compounds

X1 ground state

| Label | Atom | X         | Y         | Z         |
|-------|------|-----------|-----------|-----------|
| 1     | C    | 0.090549  | -0.601409 | -0.151868 |
| 2     | C    | -2.10656  | -0.198777 | -0.010199 |
| 3     | C    | -2.295356 | -1.570487 | -0.293268 |
| 4     | N    | -1.321102 | -2.419089 | -0.497902 |
| 5     | N    | -0.085225 | -1.911168 | -0.436392 |
| 6     | N    | -0.885889 | 0.306799  | 0.072791  |
| 7     | C    | -4.300679 | -0.735007 | -0.062145 |
| 8     | C    | -5.683105 | -0.620277 | 0.001224  |
| 9     | C    | -3.431217 | 0.357022  | 0.145264  |
| 10    | C    | -6.190019 | 0.649631  | 0.286007  |
| 11    | H    | -6.328365 | -1.477004 | -0.162455 |
| 12    | C    | -3.960008 | 1.62317   | 0.431702  |
| 13    | C    | -5.344218 | 1.756786  | 0.499222  |
| 14    | H    | -7.266381 | 0.785604  | 0.345369  |
| 15    | H    | -3.302006 | 2.470801  | 0.59765   |
| 16    | H    | -5.782159 | 2.725882  | 0.719619  |
| 17    | O    | -3.62169  | -1.909136 | -0.32875  |
| 18    | N    | 1.409661  | -0.159895 | -0.082927 |
| 19    | C    | 2.564501  | -0.982505 | 0.056673  |
| 20    | C    | 1.836947  | 1.196428  | -0.120814 |
| 21    | C    | 2.694007  | -2.372842 | 0.159743  |
| 22    | C    | 3.702365  | -0.1446   | 0.118771  |
| 23    | C    | 1.111854  | 2.383554  | -0.280337 |
| 24    | C    | 3.246794  | 1.223946  | -0.004975 |
| 25    | C    | 3.977155  | -2.898351 | 0.330098  |
| 26    | H    | 1.833397  | -3.021532 | 0.093344  |
| 27    | C    | 4.978838  | -0.692826 | 0.282934  |
| 28    | C    | 1.821491  | 3.58648   | -0.317567 |
| 29    | H    | 0.035514  | 2.377013  | -0.361854 |
| 30    | C    | 3.93722   | 2.439925  | -0.038101 |
| 31    | C    | 5.112526  | -2.075293 | 0.389282  |
| 32    | H    | 4.091405  | -3.976293 | 0.410036  |
| 33    | H    | 5.851457  | -0.04634  | 0.329685  |
| 34    | C    | 3.218893  | 3.623468  | -0.193992 |
| 35    | H    | 1.269314  | 4.514574  | -0.441555 |
| 36    | H    | 5.02043   | 2.457432  | 0.05091   |
| 37    | H    | 6.096608  | -2.518212 | 0.517059  |
| 38    | H    | 3.740328  | 4.57642   | -0.222719 |

**X1** first singlet excited state (S1)

| Label | Atom | X         | Y         | Z         |
|-------|------|-----------|-----------|-----------|
| 1     | C    | 0.046162  | -0.448008 | -0.413664 |
| 2     | C    | -2.081293 | -0.10014  | -0.014296 |
| 3     | C    | -2.29193  | -1.170709 | -0.906574 |
| 4     | N    | -1.383206 | -1.870641 | -1.540346 |
| 5     | N    | -0.090221 | -1.442736 | -1.251088 |
| 6     | N    | -0.798344 | 0.309735  | 0.265528  |
| 7     | C    | -4.273412 | -0.526629 | -0.248493 |
| 8     | C    | -5.640042 | -0.445918 | -0.103616 |
| 9     | C    | -3.3617   | 0.324326  | 0.421569  |
| 10    | C    | -6.128004 | 0.542222  | 0.763902  |
| 11    | H    | -6.301874 | -1.120054 | -0.638498 |
| 12    | C    | -3.872422 | 1.305929  | 1.288068  |
| 13    | C    | -5.252149 | 1.398879  | 1.444623  |
| 14    | H    | -7.199946 | 0.641212  | 0.90876   |
| 15    | H    | -3.200574 | 1.970938  | 1.822526  |
| 16    | H    | -5.662072 | 2.152771  | 2.112268  |
| 17    | O    | -3.617108 | -1.43195  | -1.051774 |
| 18    | N    | 1.453746  | -0.112641 | -0.175433 |
| 19    | C    | 2.422294  | -1.001866 | 0.18735   |
| 20    | C    | 1.991019  | 1.144893  | -0.279997 |
| 21    | C    | 2.308141  | -2.386406 | 0.397205  |
| 22    | C    | 3.656707  | -0.307966 | 0.342819  |
| 23    | C    | 1.3557    | 2.339324  | -0.640935 |
| 24    | C    | 3.375183  | 1.085114  | 0.033387  |
| 25    | C    | 3.457489  | -3.06565  | 0.782564  |
| 26    | H    | 1.363456  | -2.889032 | 0.233768  |
| 27    | C    | 4.784004  | -1.006959 | 0.721658  |
| 28    | C    | 2.141522  | 3.488269  | -0.684483 |
| 29    | H    | 0.294681  | 2.356616  | -0.854253 |
| 30    | C    | 4.133449  | 2.238084  | -0.014339 |
| 31    | C    | 4.67423   | -2.394219 | 0.943185  |
| 32    | H    | 3.410685  | -4.13665  | 0.952271  |
| 33    | H    | 5.74121   | -0.509177 | 0.849167  |
| 34    | C    | 3.503448  | 3.44398   | -0.377597 |
| 35    | H    | 1.684435  | 4.433897  | -0.958539 |
| 36    | H    | 5.194382  | 2.225982  | 0.219704  |
| 37    | H    | 5.557072  | -2.952558 | 1.240512  |
| 38    | H    | 4.091195  | 4.356347  | -0.418144 |



## X2 ground state

| Label | Atom | X         | Y         | Z         |
|-------|------|-----------|-----------|-----------|
| 1     | C    | -0.093148 | -0.623289 | 0.315815  |
| 2     | C    | 2.105609  | -0.291982 | 0.073318  |
| 3     | C    | 2.233619  | -1.698429 | 0.03332   |
| 4     | N    | 1.230492  | -2.52968  | 0.148612  |
| 5     | N    | 0.023956  | -1.972725 | 0.298868  |
| 6     | N    | 0.917661  | 0.271744  | 0.22047   |
| 7     | C    | 4.262166  | -0.916279 | -0.188657 |
| 8     | C    | 5.639902  | -0.844711 | -0.350773 |
| 9     | C    | 3.44555   | 0.229147  | -0.074018 |
| 10    | C    | 6.196685  | 0.43539   | -0.397256 |
| 11    | H    | 6.24472   | -1.741377 | -0.43703  |
| 12    | C    | 4.023384  | 1.505028  | -0.124207 |
| 13    | C    | 5.403464  | 1.595211  | -0.286239 |
| 14    | H    | 7.27108   | 0.537935  | -0.523363 |
| 15    | H    | 3.403892  | 2.392976  | -0.040968 |
| 16    | H    | 5.878906  | 2.570819  | -0.329442 |
| 17    | O    | 3.539439  | -2.091176 | -0.122907 |
| 18    | N    | -1.384249 | -0.117573 | 0.450975  |
| 19    | C    | -2.54952  | -0.929312 | 0.240008  |
| 20    | C    | -1.641922 | 1.289999  | 0.384816  |
| 21    | C    | -3.502078 | -0.437816 | -0.662506 |
| 22    | C    | -2.801289 | -2.137881 | 0.897017  |
| 23    | C    | -2.62078  | 1.715561  | -0.521262 |
| 24    | C    | -1.01069  | 2.239666  | 1.193903  |
| 25    | C    | -4.661275 | -1.151154 | -0.955851 |
| 26    | O    | -3.312328 | 0.788448  | -1.276861 |
| 27    | C    | -3.959383 | -2.861266 | 0.605661  |
| 28    | H    | -2.075009 | -2.522297 | 1.601095  |
| 29    | C    | -2.932358 | 3.064979  | -0.67218  |
| 30    | H    | -0.268257 | 1.916657  | 1.91405   |
| 31    | C    | -1.312603 | 3.594436  | 1.047141  |
| 32    | C    | -4.88177  | -2.377503 | -0.327169 |
| 33    | H    | -5.36918  | -0.734517 | -1.665847 |
| 34    | H    | -4.134794 | -3.809065 | 1.106455  |
| 35    | H    | -3.695075 | 3.351042  | -1.389971 |
| 36    | C    | -2.261835 | 4.008987  | 0.106642  |
| 37    | H    | -0.804724 | 4.325897  | 1.669441  |
| 38    | H    | -5.779466 | -2.945372 | -0.555614 |
| 39    | H    | -2.494375 | 5.064071  | -0.008277 |

**X2** first singlet excited state (S1)

| Label | Atom | X         | Y         | Z         |
|-------|------|-----------|-----------|-----------|
| 1     | C    | -0.003156 | -0.000095 | 0.589922  |
| 2     | C    | 2.112364  | -0.000026 | 0.017562  |
| 3     | C    | 2.353803  | -0.000252 | 1.404232  |
| 4     | N    | 1.464606  | -0.000398 | 2.370682  |
| 5     | N    | 0.161779  | -0.000306 | 1.887996  |
| 6     | N    | 0.816886  | 0.000063  | -0.448687 |
| 7     | C    | 4.317025  | -0.000119 | 0.445696  |
| 8     | C    | 5.681622  | -0.000107 | 0.25975   |
| 9     | C    | 3.381363  | 0.000063  | -0.616448 |
| 10    | C    | 6.140546  | 0.000099  | -1.065024 |
| 11    | H    | 6.363051  | -0.000251 | 1.104926  |
| 12    | C    | 3.863172  | 0.000264  | -1.936354 |
| 13    | C    | 5.239904  | 0.000276  | -2.139205 |
| 14    | H    | 7.209491  | 0.000115  | -1.258142 |
| 15    | H    | 3.171499  | 0.000407  | -2.773488 |
| 16    | H    | 5.628083  | 0.000431  | -3.154817 |
| 17    | O    | 3.687336  | -0.000309 | 1.669306  |
| 18    | N    | -1.426111 | -0.000019 | 0.214651  |
| 19    | C    | -2.081719 | -1.187568 | 0.037041  |
| 20    | C    | -2.081622 | 1.187606  | 0.037174  |
| 21    | C    | -3.442332 | -1.170536 | -0.350716 |
| 22    | C    | -1.455739 | -2.433814 | 0.226604  |
| 23    | C    | -3.442231 | 1.170727  | -0.350592 |
| 24    | C    | -1.455543 | 2.433778  | 0.226879  |
| 25    | C    | -4.160126 | -2.344507 | -0.548253 |
| 26    | O    | -4.095709 | 0.000132  | -0.544654 |
| 27    | C    | -2.171512 | -3.59583  | 0.02933   |
| 28    | H    | -0.41739  | -2.460456 | 0.530104  |
| 29    | C    | -4.159928 | 2.344776  | -0.548015 |
| 30    | H    | -0.417192 | 2.460312  | 0.530382  |
| 31    | C    | -2.17122  | 3.595876  | 0.029728  |
| 32    | C    | -3.522857 | -3.558683 | -0.358237 |
| 33    | H    | -5.201753 | -2.277689 | -0.845409 |
| 34    | H    | -1.680708 | -4.552251 | 0.178926  |
| 35    | H    | -5.20156  | 2.278082  | -0.845187 |
| 36    | C    | -3.522563 | 3.55888   | -0.357864 |
| 37    | H    | -1.680337 | 4.552239  | 0.179425  |
| 38    | H    | -4.071097 | -4.483475 | -0.508069 |
| 39    | H    | -4.070725 | 4.483731  | -0.507615 |

**X3** ground state

| Label | Atom | X         | Y         | Z         |
|-------|------|-----------|-----------|-----------|
| 1     | C    | 0.015965  | -0.636131 | -0.300017 |
| 2     | C    | 2.215457  | -0.308334 | -0.070308 |
| 3     | C    | 2.333542  | -1.712057 | 0.03419   |
| 4     | N    | 1.324595  | -2.541317 | -0.04021  |
| 5     | N    | 0.121435  | -1.984612 | -0.213916 |
| 6     | N    | 1.031473  | 0.256754  | -0.245212 |
| 7     | C    | 4.367911  | -0.935053 | 0.219521  |
| 8     | C    | 5.746363  | -0.865502 | 0.376892  |
| 9     | C    | 3.559161  | 0.209542  | 0.052552  |
| 10    | C    | 6.31224   | 0.411388  | 0.362955  |
| 11    | H    | 6.345055  | -1.761406 | 0.504188  |
| 12    | C    | 4.146035  | 1.482212  | 0.042142  |
| 13    | C    | 5.526957  | 1.570259  | 0.198441  |
| 14    | H    | 7.387512  | 0.512116  | 0.483041  |
| 15    | H    | 3.532523  | 2.369462  | -0.08258  |
| 16    | H    | 6.009236  | 2.543481  | 0.195104  |
| 17    | O    | 3.637155  | -2.106399 | 0.208749  |
| 18    | N    | -1.269524 | -0.130215 | -0.460383 |
| 19    | C    | -1.511316 | 1.283107  | -0.465718 |
| 20    | C    | -2.428617 | -0.96944  | -0.341945 |
| 21    | C    | -2.355971 | 1.823115  | 0.515189  |
| 22    | C    | -0.967055 | 2.118494  | -1.446455 |
| 23    | C    | -3.372547 | -0.665261 | 0.649926  |
| 24    | C    | -2.65929  | -2.039446 | -1.212208 |
| 25    | C    | -2.622329 | 3.197726  | 0.534043  |
| 26    | S    | -3.090666 | 0.734264  | 1.723691  |
| 27    | C    | -1.217046 | 3.489936  | -1.414311 |
| 28    | H    | -0.331699 | 1.690498  | -2.214572 |
| 29    | C    | -4.524496 | -1.448765 | 0.789423  |
| 30    | H    | -1.929839 | -2.26464  | -1.981923 |
| 31    | C    | -3.796856 | -2.83063  | -1.058722 |
| 32    | C    | -2.037666 | 4.031842  | -0.418749 |
| 33    | H    | -3.291347 | 3.603671  | 1.287807  |
| 34    | H    | -0.778185 | 4.134082  | -2.171373 |
| 35    | H    | -5.256877 | -1.194876 | 1.550762  |
| 36    | C    | -4.726101 | -2.541322 | -0.053574 |
| 37    | H    | -3.958121 | -3.672715 | -1.725927 |
| 38    | H    | -2.240825 | 5.099184  | -0.397574 |
| 39    | H    | -5.615914 | -3.154232 | 0.062422  |

**X3** first singlet excited state (S1)

| Label | Atom | X         | Y         | Z         |
|-------|------|-----------|-----------|-----------|
| 1     | C    | -0.125537 | -0.000124 | 0.609121  |
| 2     | C    | -2.237206 | -0.000019 | 0.012286  |
| 3     | C    | -2.496204 | -0.000461 | 1.395905  |
| 4     | N    | -1.618476 | -0.000731 | 2.372013  |
| 5     | N    | -0.309014 | -0.000535 | 1.905278  |
| 6     | N    | -0.936345 | 0.000163  | -0.437051 |
| 7     | C    | -4.447401 | -0.000183 | 0.412776  |
| 8     | C    | -5.80946  | -0.000148 | 0.209382  |
| 9     | C    | -3.498174 | 0.000149  | -0.637454 |
| 10    | C    | -6.251596 | 0.000236  | -1.121266 |
| 11    | H    | -6.501639 | -0.000411 | 1.045787  |
| 12    | C    | -3.963256 | 0.00053   | -1.963478 |
| 13    | C    | -5.337285 | 0.000563  | -2.183848 |
| 14    | H    | -7.318001 | 0.000278  | -1.327953 |
| 15    | H    | -3.260837 | 0.000791  | -2.791608 |
| 16    | H    | -5.712497 | 0.000855  | -3.204338 |
| 17    | O    | -3.833395 | -0.00055  | 1.644386  |
| 18    | N    | 1.303631  | -0.000009 | 0.246779  |
| 19    | C    | 1.913124  | 1.220885  | 0.086666  |
| 20    | C    | 1.913205  | -1.220831 | 0.086461  |
| 21    | C    | 3.266947  | 1.355445  | -0.314522 |
| 22    | C    | 1.182805  | 2.407234  | 0.325848  |
| 23    | C    | 3.267027  | -1.35523  | -0.314743 |
| 24    | C    | 1.182965  | -2.407284 | 0.325412  |
| 25    | C    | 3.851114  | 2.621696  | -0.469088 |
| 26    | S    | 4.288889  | 0.000165  | -0.651458 |
| 27    | C    | 1.770782  | 3.64167   | 0.16886   |
| 28    | H    | 0.152114  | 2.334565  | 0.643041  |
| 29    | C    | 3.851312  | -2.621412 | -0.469539 |
| 30    | H    | 0.152275  | -2.334779 | 0.642647  |
| 31    | C    | 1.771035  | -3.641638 | 0.168179  |
| 32    | C    | 3.112221  | 3.761515  | -0.231143 |
| 33    | H    | 4.891349  | 2.690717  | -0.777114 |
| 34    | H    | 1.182208  | 4.533144  | 0.362499  |
| 35    | H    | 4.891555  | -2.690268 | -0.777571 |
| 36    | C    | 3.112495  | -3.761323 | -0.231834 |
| 37    | H    | 1.182523  | -4.533198 | 0.36162   |
| 38    | H    | 3.566761  | 4.739949  | -0.350462 |
| 39    | H    | 3.567078  | -4.739717 | -0.351316 |

**X4** ground state

| Label | Atom | X         | Y         | Z         |
|-------|------|-----------|-----------|-----------|
| 1     | C    | -0.259832 | -0.625036 | -0.148811 |
| 2     | C    | 1.955788  | -0.240501 | -0.013173 |
| 3     | C    | 2.144186  | -1.619904 | -0.283331 |
| 4     | N    | 1.129114  | -2.446927 | -0.471295 |
| 5     | N    | -0.098711 | -1.942468 | -0.414236 |
| 6     | N    | 0.729269  | 0.262514  | 0.061317  |
| 7     | S    | 3.842385  | -2.092517 | -0.337641 |
| 8     | C    | 4.310087  | -0.416976 | 0.012081  |
| 9     | C    | 5.620607  | 0.053332  | 0.140371  |
| 10    | C    | 3.209536  | 0.459625  | 0.163814  |
| 11    | C    | 5.816295  | 1.404504  | 0.423297  |
| 12    | H    | 6.468209  | -0.615902 | 0.023944  |
| 13    | C    | 3.425006  | 1.816189  | 0.451811  |
| 14    | C    | 4.728103  | 2.28295   | 0.579946  |
| 15    | H    | 6.829776  | 1.783181  | 0.526095  |
| 16    | H    | 2.573693  | 2.479355  | 0.574735  |
| 17    | H    | 4.91003   | 3.330202  | 0.803419  |
| 18    | N    | -1.571806 | -0.165214 | -0.087412 |
| 19    | C    | -1.980542 | 1.194925  | -0.158753 |
| 20    | C    | -2.736856 | -0.967603 | 0.082136  |
| 21    | C    | -1.239475 | 2.365067  | -0.361874 |
| 22    | C    | -3.388639 | 1.246074  | -0.031932 |
| 23    | C    | -2.883607 | -2.3527   | 0.223102  |
| 24    | C    | -3.862371 | -0.112436 | 0.13142   |
| 25    | C    | -1.931223 | 3.577079  | -0.428107 |
| 26    | H    | -0.164358 | 2.338507  | -0.456337 |
| 27    | C    | -4.061115 | 2.470935  | -0.094411 |
| 28    | C    | -4.17227  | -2.856112 | 0.41676   |
| 29    | H    | -2.032081 | -3.014429 | 0.16687   |
| 30    | C    | -5.144654 | -0.638781 | 0.320163  |
| 31    | C    | -3.32661  | 3.638417  | -0.291524 |
| 32    | H    | -1.3671   | 4.492699  | -0.586243 |
| 33    | H    | -5.143116 | 2.507743  | 0.002934  |
| 34    | C    | -5.295858 | -2.016152 | 0.463383  |
| 35    | H    | -4.300579 | -3.929914 | 0.525651  |
| 36    | H    | -6.00813  | 0.020442  | 0.35746   |
| 37    | H    | -3.834199 | 4.597822  | -0.343546 |
| 38    | H    | -6.284701 | -2.442136 | 0.61045   |

**X4** first singlet excited state (S1)

| Label | Atom | X         | Y         | Z         |
|-------|------|-----------|-----------|-----------|
| 1     | C    | -0.213338 | -0.507934 | -0.403268 |
| 2     | C    | 1.936441  | -0.144924 | -0.04232  |
| 3     | C    | 2.139008  | -1.288476 | -0.844606 |
| 4     | N    | 1.193869  | -2.020556 | -1.407127 |
| 5     | N    | -0.095354 | -1.570863 | -1.155986 |
| 6     | N    | 0.648428  | 0.287056  | 0.198711  |
| 7     | S    | 3.842285  | -1.664294 | -1.020533 |
| 8     | C    | 4.281759  | -0.287834 | -0.015326 |
| 9     | C    | 5.56849   | 0.099321  | 0.330442  |
| 10    | C    | 3.142934  | 0.429507  | 0.437396  |
| 11    | C    | 5.736189  | 1.22183   | 1.145306  |
| 12    | H    | 6.430954  | -0.459376 | -0.024066 |
| 13    | C    | 3.333909  | 1.555505  | 1.260129  |
| 14    | C    | 4.622258  | 1.939106  | 1.604033  |
| 15    | H    | 6.737884  | 1.536362  | 1.424841  |
| 16    | H    | 2.468054  | 2.105335  | 1.618321  |
| 17    | H    | 4.771544  | 2.807782  | 2.240775  |
| 18    | N    | -1.612476 | -0.133356 | -0.178972 |
| 19    | C    | -2.131837 | 1.120547  | -0.376458 |
| 20    | C    | -2.590914 | -0.976654 | 0.260906  |
| 21    | C    | -1.483306 | 2.272312  | -0.838704 |
| 22    | C    | -3.51308  | 1.107361  | -0.045182 |
| 23    | C    | -2.495799 | -2.342191 | 0.576641  |
| 24    | C    | -3.812373 | -0.252845 | 0.374178  |
| 25    | C    | -2.252205 | 3.426663  | -0.963615 |
| 26    | H    | -0.425321 | 2.255422  | -1.066915 |
| 27    | C    | -4.254445 | 2.265055  | -0.175351 |
| 28    | C    | -3.651371 | -2.970619 | 1.025089  |
| 29    | H    | -1.56084  | -2.871272 | 0.443083  |
| 30    | C    | -4.946165 | -0.901763 | 0.81777   |
| 31    | C    | -3.610779 | 3.428453  | -0.638899 |
| 32    | H    | -1.784486 | 4.340189  | -1.317142 |
| 33    | H    | -5.312632 | 2.288089  | 0.070074  |
| 34    | C    | -4.855588 | -2.269098 | 1.145367  |
| 35    | H    | -3.619204 | -4.025882 | 1.277017  |
| 36    | H    | -5.893855 | -0.379659 | 0.915808  |
| 37    | H    | -4.185165 | 4.344071  | -0.745042 |
| 38    | H    | -5.743482 | -2.788256 | 1.494237  |

## X5 ground state

| Label | Atom | X         | Y         | Z         |
|-------|------|-----------|-----------|-----------|
| 1     | C    | 0.256311  | -0.636292 | 0.310552  |
| 2     | C    | -1.961466 | -0.329852 | 0.072454  |
| 3     | C    | -2.085821 | -1.7414   | 0.027753  |
| 4     | N    | -1.04055  | -2.544126 | 0.139563  |
| 5     | N    | 0.156922  | -1.988859 | 0.287419  |
| 6     | N    | -0.768683 | 0.232326  | 0.219531  |
| 7     | S    | -3.754223 | -2.286985 | -0.167735 |
| 8     | C    | -4.293099 | -0.597006 | -0.195879 |
| 9     | C    | -5.615391 | -0.164335 | -0.337253 |
| 10    | C    | -3.239045 | 0.337185  | -0.059321 |
| 11    | C    | -5.868973 | 1.20677   | -0.341292 |
| 12    | H    | -6.428107 | -0.877394 | -0.442419 |
| 13    | C    | -3.511492 | 1.713718  | -0.068174 |
| 14    | C    | -4.826416 | 2.142784  | -0.208703 |
| 15    | H    | -6.892303 | 1.556204  | -0.450697 |
| 16    | H    | -2.692101 | 2.419972  | 0.030699  |
| 17    | H    | -5.052916 | 3.20515   | -0.218338 |
| 18    | N    | 1.53818   | -0.112168 | 0.446375  |
| 19    | C    | 1.775183  | 1.299146  | 0.383923  |
| 20    | C    | 2.716749  | -0.906202 | 0.241405  |
| 21    | C    | 2.751554  | 1.740201  | -0.51744  |
| 22    | C    | 1.126298  | 2.237886  | 1.191804  |
| 23    | C    | 3.666148  | -0.399454 | -0.655894 |
| 24    | C    | 2.983329  | -2.110999 | 0.899347  |
| 25    | C    | 3.042885  | 3.094428  | -0.665862 |
| 26    | O    | 3.460847  | 0.824427  | -1.270164 |
| 27    | C    | 1.408645  | 3.597262  | 1.047969  |
| 28    | H    | 0.387106  | 1.902399  | 1.909553  |
| 29    | C    | 4.837494  | -1.094954 | -0.943768 |
| 30    | H    | 2.259613  | -2.506666 | 1.599878  |
| 31    | C    | 4.153721  | -2.816472 | 0.613445  |
| 32    | C    | 2.354963  | 4.027161  | 0.111357  |
| 33    | H    | 3.804134  | 3.392966  | -1.380105 |
| 34    | H    | 0.888434  | 4.320234  | 1.67004   |
| 35    | H    | 5.542679  | -0.667168 | -1.649808 |
| 36    | C    | 5.073291  | -2.318168 | -0.314556 |
| 37    | H    | 4.341185  | -3.761646 | 1.114805  |
| 38    | H    | 2.572059  | 5.085765  | -0.001335 |
| 39    | H    | 5.980716  | -2.872127 | -0.538614 |

**X5** first singlet excited state (S1)

| Label | Atom | X         | Y         | Z         |
|-------|------|-----------|-----------|-----------|
| 1     | C    | -0.162974 | -0.000129 | -0.627093 |
| 2     | C    | 1.975368  | -0.000043 | -0.074635 |
| 3     | C    | 2.207782  | -0.000324 | -1.464561 |
| 4     | N    | 1.280328  | -0.000502 | -2.410985 |
| 5     | N    | -0.017503 | -0.000391 | -1.927125 |
| 6     | N    | 0.675277  | 0.00007   | 0.391858  |
| 7     | S    | 3.921838  | -0.000418 | -1.837612 |
| 8     | C    | 4.325157  | -0.00008  | -0.125166 |
| 9     | C    | 5.602063  | 0.000015  | 0.419105  |
| 10    | C    | 3.168011  | 0.000098  | 0.697352  |
| 11    | C    | 5.739269  | 0.000285  | 1.808871  |
| 12    | H    | 6.478824  | -0.000124 | -0.222182 |
| 13    | C    | 3.328335  | 0.000376  | 2.095414  |
| 14    | C    | 4.606312  | 0.000469  | 2.6351    |
| 15    | H    | 6.731837  | 0.000361  | 2.248918  |
| 16    | H    | 2.44744   | 0.000513  | 2.729937  |
| 17    | H    | 4.732922  | 0.000684  | 3.714264  |
| 18    | N    | -1.579286 | -0.000033 | -0.226619 |
| 19    | C    | -2.231832 | 1.187708  | -0.039812 |
| 20    | C    | -2.231946 | -1.18767  | -0.039586 |
| 21    | C    | -3.58745  | 1.17088   | 0.364555  |
| 22    | C    | -1.606719 | 2.433332  | -0.235956 |
| 23    | C    | -3.587567 | -1.170633 | 0.364774  |
| 24    | C    | -1.606953 | -2.433396 | -0.235495 |
| 25    | C    | -4.301996 | 2.345119  | 0.571328  |
| 26    | O    | -4.238813 | 0.000172  | 0.565596  |
| 27    | C    | -2.319468 | 3.595402  | -0.029431 |
| 28    | H    | -0.57232  | 2.458444  | -0.55134  |
| 29    | C    | -4.302228 | -2.344766 | 0.571756  |
| 30    | H    | -0.572558 | -2.458654 | -0.550877 |
| 31    | C    | -2.319815 | -3.595356 | -0.028756 |
| 32    | C    | -3.665989 | 3.558709  | 0.374175  |
| 33    | H    | -5.339317 | 2.278501  | 0.880756  |
| 34    | H    | -1.830212 | 4.551093  | -0.183887 |
| 35    | H    | -5.339544 | -2.277985 | 0.881165  |
| 36    | C    | -3.666337 | -3.558454 | 0.37483   |
| 37    | H    | -1.830655 | -4.551123 | -0.183035 |
| 38    | H    | -4.21137  | 4.483266  | 0.530981  |
| 39    | H    | -4.21181  | -4.48293  | 0.531794  |



## X6 ground state

| Label | Atom | X         | Y         | Z         |
|-------|------|-----------|-----------|-----------|
| 1     | C    | -0.14554  | -0.649029 | -0.299093 |
| 2     | C    | 2.072384  | -0.346015 | -0.068839 |
| 3     | C    | 2.188112  | -1.755363 | 0.02885   |
| 4     | N    | 1.138189  | -2.556177 | -0.05079  |
| 5     | N    | -0.056403 | -2.00072  | -0.218387 |
| 6     | N    | 0.883157  | 0.217798  | -0.239433 |
| 7     | S    | 3.85366   | -2.302907 | 0.246675  |
| 8     | C    | 4.402617  | -0.616516 | 0.209652  |
| 9     | C    | 5.727457  | -0.186287 | 0.333937  |
| 10    | C    | 3.353993  | 0.317888  | 0.037625  |
| 11    | C    | 5.98897   | 1.182475  | 0.285104  |
| 12    | H    | 6.536126  | -0.899445 | 0.466275  |
| 13    | C    | 3.634343  | 1.692108  | -0.007342 |
| 14    | C    | 4.951791  | 2.118692  | 0.116406  |
| 15    | H    | 7.014356  | 1.529955  | 0.380826  |
| 16    | H    | 2.818728  | 2.398223  | -0.134508 |
| 17    | H    | 5.184528  | 3.179304  | 0.084685  |
| 18    | N    | -1.422194 | -0.124544 | -0.456963 |
| 19    | C    | -1.642478 | 1.292376  | -0.460818 |
| 20    | C    | -2.594461 | -0.946562 | -0.346094 |
| 21    | C    | -2.48266  | 1.843128  | 0.51788   |
| 22    | C    | -1.081343 | 2.120676  | -1.438023 |
| 23    | C    | -3.538152 | -0.629453 | 0.642046  |
| 24    | C    | -2.837302 | -2.011058 | -1.219699 |
| 25    | C    | -2.727286 | 3.221775  | 0.538552  |
| 26    | S    | -3.23981  | 0.763219  | 1.720286  |
| 27    | C    | -1.310348 | 3.495797  | -1.404211 |
| 28    | H    | -0.450627 | 1.683893  | -2.204999 |
| 29    | C    | -4.702705 | -1.395238 | 0.774315  |
| 30    | H    | -2.108085 | -2.24565  | -1.986796 |
| 31    | C    | -3.987818 | -2.784743 | -1.073164 |
| 32    | C    | -2.125851 | 4.048461  | -0.410271 |
| 33    | H    | -3.392893 | 3.636718  | 1.290416  |
| 34    | H    | -0.859429 | 4.134487  | -2.158829 |
| 35    | H    | -5.434777 | -1.131567 | 1.532606  |
| 36    | C    | -4.917119 | -2.482976 | -0.071823 |
| 37    | H    | -4.159007 | -3.622873 | -1.742853 |
| 38    | H    | -2.312446 | 5.118797  | -0.387807 |
| 39    | H    | -5.816923 | -3.082155 | 0.038667  |

**X6** first singlet excited state (S1)

| Label | Atom | X         | Y         | Z         |
|-------|------|-----------|-----------|-----------|
| 1     | C    | 0.033308  | -0.000214 | -0.645177 |
| 2     | C    | -2.101956 | -0.000077 | -0.069741 |
| 3     | C    | -2.350708 | -0.000495 | -1.457111 |
| 4     | N    | -1.433723 | -0.000764 | -2.412736 |
| 5     | N    | -0.129661 | -0.000612 | -1.943735 |
| 6     | N    | -0.796811 | 0.000095  | 0.380706  |
| 7     | S    | -4.069508 | -0.000639 | -1.810093 |
| 8     | C    | -4.452501 | -0.00013  | -0.092802 |
| 9     | C    | -5.722788 | 0.000004  | 0.466501  |
| 10    | C    | -3.28552  | 0.000133  | 0.715948  |
| 11    | C    | -5.843679 | 0.00041   | 1.857941  |
| 12    | H    | -6.607071 | -0.000211 | -0.164388 |
| 13    | C    | -3.429448 | 0.000543  | 2.115946  |
| 14    | C    | -4.70096  | 0.000681  | 2.670653  |
| 15    | H    | -6.830983 | 0.000514  | 2.309674  |
| 16    | H    | -2.540989 | 0.000751  | 2.739823  |
| 17    | H    | -4.814768 | 0.000998  | 3.751259  |
| 18    | N    | 1.455862  | -0.000059 | -0.256937 |
| 19    | C    | 2.062239  | 1.220984  | -0.087852 |
| 20    | C    | 2.06244   | -1.220965 | -0.087457 |
| 21    | C    | 3.413277  | 1.355807  | 0.321747  |
| 22    | C    | 1.330286  | 2.406495  | -0.326114 |
| 23    | C    | 3.41355   | -1.355422 | 0.322018  |
| 24    | C    | 1.330653  | -2.406676 | -0.325221 |
| 25    | C    | 3.99405   | 2.622545  | 0.484449  |
| 26    | S    | 4.436381  | 0.000334  | 0.655155  |
| 27    | C    | 1.915153  | 3.641097  | -0.16112  |
| 28    | H    | 0.301364  | 2.331911  | -0.647394 |
| 29    | C    | 3.994609  | -2.622002 | 0.484906  |
| 30    | H    | 0.301647  | -2.332371 | -0.646287 |
| 31    | C    | 1.915789  | -3.641125 | -0.16001  |
| 32    | C    | 3.254161  | 3.761564  | 0.246519  |
| 33    | H    | 5.031669  | 2.69243   | 0.798524  |
| 34    | H    | 1.326213  | 4.531754  | -0.353676 |
| 35    | H    | 5.032294  | -2.691609 | 0.798824  |
| 36    | C    | 3.254904  | -3.761226 | 0.247365  |
| 37    | H    | 1.326973  | -4.531944 | -0.352192 |
| 38    | H    | 3.705936  | 4.73972   | 0.372242  |
| 39    | H    | 3.706915  | -4.739256 | 0.373206  |

**X7 ground state**

| Label | Atom | X         | Y         | Z         |
|-------|------|-----------|-----------|-----------|
| 1     | C    | -1.428148 | -0.981617 | -0.131828 |
| 2     | C    | -3.632972 | -0.610679 | -0.007127 |
| 3     | C    | -3.799092 | -1.997957 | -0.214547 |
| 4     | N    | -2.810408 | -2.839613 | -0.374852 |
| 5     | N    | -1.583677 | -2.310069 | -0.340329 |
| 6     | N    | -2.421578 | -0.079435 | 0.042442  |
| 7     | C    | -5.818367 | -1.186076 | -0.024768 |
| 8     | C    | -7.202614 | -1.091039 | 0.035124  |
| 9     | C    | -4.967228 | -0.069622 | 0.119751  |
| 10    | C    | -7.730979 | 0.183866  | 0.24987   |
| 11    | H    | -7.833349 | -1.966391 | -0.079392 |
| 12    | C    | -5.517542 | 1.201286  | 0.335501  |
| 13    | C    | -6.903805 | 1.315298  | 0.398634  |
| 14    | H    | -8.809438 | 0.304661  | 0.304071  |
| 15    | H    | -4.874159 | 2.068332  | 0.450952  |
| 16    | H    | -7.357716 | 2.28785   | 0.565057  |
| 17    | O    | -5.120425 | -2.361118 | -0.228009 |
| 18    | N    | -0.119766 | -0.515548 | -0.093685 |
| 19    | C    | 1.060735  | -1.316347 | -0.056579 |
| 20    | C    | 0.281295  | 0.851524  | -0.075763 |
| 21    | C    | 1.245171  | -2.700372 | -0.04279  |
| 22    | C    | 2.182545  | -0.458892 | -0.007853 |
| 23    | C    | -0.454049 | 2.037773  | -0.119272 |
| 24    | C    | 1.692751  | 0.905734  | -0.027309 |
| 25    | C    | 2.553288  | -3.193346 | 0.021925  |
| 26    | H    | 0.407161  | -3.379042 | -0.09121  |
| 27    | C    | 3.47578   | -0.978711 | 0.052492  |
| 28    | C    | 0.241026  | 3.252545  | -0.11141  |
| 29    | H    | -1.532616 | 2.030588  | -0.1518   |
| 30    | C    | 2.35945   | 2.130923  | -0.0163   |
| 31    | C    | 3.690169  | -2.364216 | 0.069028  |
| 32    | H    | 2.671394  | -4.271175 | 0.030669  |
| 33    | H    | 4.316332  | -0.290697 | 0.088591  |
| 34    | C    | 1.645051  | 3.336939  | -0.057782 |
| 35    | H    | -0.352406 | 4.159536  | -0.146166 |
| 36    | H    | 3.445588  | 2.135703  | 0.021545  |
| 37    | C    | 5.126636  | -2.918709 | 0.135461  |
| 38    | C    | 2.401931  | 4.679345  | -0.044186 |
| 39    | C    | 5.928133  | -2.429819 | -1.095726 |
| 40    | C    | 5.817313  | -2.414591 | 1.426216  |
| 41    | C    | 5.164012  | -4.459683 | 0.146528  |
| 42    | C    | 3.241351  | 4.787377  | 1.252298  |
| 43    | C    | 3.344941  | 4.755091  | -1.269832 |
| 44    | C    | 1.452389  | 5.892415  | -0.098866 |
| 45    | H    | 5.465527  | -2.776921 | -2.027289 |

|    |   |          |           |           |
|----|---|----------|-----------|-----------|
| 46 | H | 5.984159 | -1.3365   | -1.138298 |
| 47 | H | 6.955278 | -2.815277 | -1.060608 |
| 48 | H | 5.274766 | -2.750948 | 2.31775   |
| 49 | H | 6.843406 | -2.799806 | 1.485769  |
| 50 | H | 5.869927 | -1.320821 | 1.460586  |
| 51 | H | 6.204884 | -4.80106  | 0.195159  |
| 52 | H | 4.640013 | -4.876034 | 1.015033  |
| 53 | H | 4.719428 | -4.886923 | -0.760105 |
| 54 | H | 2.598928 | 4.743305  | 2.139828  |
| 55 | H | 3.975396 | 3.978036  | 1.331554  |
| 56 | H | 3.789375 | 5.738148  | 1.274628  |
| 57 | H | 2.777479 | 4.687546  | -2.205647 |
| 58 | H | 3.893732 | 5.705656  | -1.271428 |
| 59 | H | 4.082495 | 3.945102  | -1.267911 |
| 60 | H | 2.039192 | 6.818588  | -0.087877 |
| 61 | H | 0.846472 | 5.897628  | -1.012783 |
| 62 | H | 0.775121 | 5.921882  | 0.763032  |

**X7** first singlet excited state (S1)

| Label | Atom | X         | Y         | Z         |
|-------|------|-----------|-----------|-----------|
| 1     | C    | -1.472964 | -0.628483 | -0.572794 |
| 2     | C    | -3.58077  | -0.38166  | -0.01683  |
| 3     | C    | -3.827899 | -1.322369 | -1.036544 |
| 4     | N    | -2.947624 | -1.909379 | -1.80839  |
| 5     | N    | -1.645486 | -1.499292 | -1.533539 |
| 6     | N    | -2.289566 | 0.009009  | 0.249469  |
| 7     | C    | -5.777804 | -0.813386 | -0.191187 |
| 8     | C    | -7.135096 | -0.77932  | 0.03634   |
| 9     | C    | -4.840085 | -0.045594 | 0.540827  |
| 10    | C    | -7.58603  | 0.070739  | 1.057075  |
| 11    | H    | -7.817688 | -1.385989 | -0.550761 |
| 12    | C    | -5.313562 | 0.797466  | 1.560839  |
| 13    | C    | -6.68364  | 0.841971  | 1.80204   |
| 14    | H    | -8.64943  | 0.128491  | 1.271033  |
| 15    | H    | -4.620664 | 1.395239  | 2.145535  |
| 16    | H    | -7.064546 | 1.489065  | 2.588464  |
| 17    | O    | -5.156909 | -1.586873 | -1.145792 |
| 18    | N    | -0.060615 | -0.302313 | -0.364686 |
| 19    | C    | 0.939905  | -1.214039 | -0.188483 |
| 20    | C    | 0.455344  | 0.965517  | -0.312598 |
| 21    | C    | 0.875365  | -2.613135 | -0.176577 |
| 22    | C    | 2.17135   | -0.527457 | -0.000339 |
| 23    | C    | -0.195304 | 2.194081  | -0.45556  |
| 24    | C    | 1.855226  | 0.891284  | -0.086824 |
| 25    | C    | 2.058323  | -3.308984 | 0.042077  |
| 26    | H    | -0.062916 | -3.121589 | -0.359781 |
| 27    | C    | 3.327159  | -1.245615 | 0.208724  |
| 28    | C    | 0.580351  | 3.34642   | -0.370961 |
| 29    | H    | -1.266497 | 2.237749  | -0.606704 |
| 30    | C    | 2.596388  | 2.049822  | -0.004473 |
| 31    | C    | 3.292215  | -2.664496 | 0.236653  |
| 32    | H    | 2.013602  | -4.391721 | 0.05039   |
| 33    | H    | 4.269976  | -0.724845 | 0.351989  |
| 34    | C    | 1.966201  | 3.312333  | -0.146968 |
| 35    | H    | 0.079564  | 4.301345  | -0.479988 |
| 36    | H    | 3.667798  | 1.99567   | 0.168665  |
| 37    | C    | 4.589927  | -3.430649 | 0.469211  |
| 38    | C    | 2.814091  | 4.577255  | -0.052041 |
| 39    | C    | 5.590015  | -3.081163 | -0.648519 |
| 40    | C    | 5.181307  | -3.020665 | 1.830741  |
| 41    | C    | 4.384866  | -4.947825 | 0.472532  |
| 42    | C    | 3.496895  | 4.626545  | 1.327099  |
| 43    | C    | 3.889224  | 4.548885  | -1.153871 |
| 44    | C    | 1.986039  | 5.853644  | -0.222748 |
| 45    | H    | 5.195243  | -3.360632 | -1.631647 |

|    |   |          |           |           |
|----|---|----------|-----------|-----------|
| 46 | H | 5.828087 | -2.012304 | -0.672125 |
| 47 | H | 6.528188 | -3.626064 | -0.490231 |
| 48 | H | 4.490432 | -3.257355 | 2.647609  |
| 49 | H | 6.116886 | -3.564362 | 2.007283  |
| 50 | H | 5.406691 | -1.949898 | 1.879242  |
| 51 | H | 5.346415 | -5.44325  | 0.645883  |
| 52 | H | 3.70311  | -5.268567 | 1.26856   |
| 53 | H | 3.997027 | -5.312279 | -0.485562 |
| 54 | H | 2.755037 | 4.646416  | 2.133246  |
| 55 | H | 4.153811 | 3.76624   | 1.494811  |
| 56 | H | 4.110462 | 5.531828  | 1.405972  |
| 57 | H | 3.432263 | 4.513322  | -2.149148 |
| 58 | H | 4.506607 | 5.453048  | -1.094296 |
| 59 | H | 4.556649 | 3.685604  | -1.058549 |
| 60 | H | 2.644114 | 6.72608   | -0.145563 |
| 61 | H | 1.49711  | 5.898286  | -1.202713 |
| 62 | H | 1.218755 | 5.952536  | 0.553681  |

---

## References

<sup>1</sup> T. Taldone, P. D. Patel, H. J. Patel and G. Chiosis, *Tetrahedron Lett.*, 2012, **53**, 2548–2551.

<sup>2</sup> Gaussian 16, Revision B.01, M. J. Frisch, G. W. Trucks, H. B. Schlegel, G. E. Scuseria, M. A. Robb, J. R. Cheeseman, G. Scalmani, V. Barone, G. A. Petersson, H. Nakatsuji, X. Li, M. Caricato, A. V. Marenich, J. Bloino, B. G. Janesko, R. Gomperts, B. Mennucci, H. P. Hratchian, J. V. Ortiz, A. F. Izmaylov, J. L. Sonnenberg, D. Williams-Young, F. Ding, F. Lipparini, F. Egidi, J. Goings, B. Peng, A. Petrone, T. Henderson, D. Ranasinghe, V. G. Zakrzewski, J. Gao, N. Rega, G. Zheng, W. Liang, M. Hada, M. Ehara, K. Toyota, R. Fukuda, J. Hasegawa, M. Ishida, T. Nakajima, Y. Honda, O. Kitao, H. Nakai, T. Vreven, K. Throssell, J. A. Montgomery, Jr., J. E. Peralta, F. Ogliaro, M. J. Bearpark, J. J. Heyd, E. N. Brothers, K. N. Kudin, V. N. Staroverov, T. A. Keith, R. Kobayashi, J. Normand, K. Raghavachari, A. P. Rendell, J. C. Burant, S. S. Iyengar, J. Tomasi, M. Cossi, J. M. Millam, M. Klene, C. Adamo, R. Cammi, J. W. Ochterski, R. L. Martin, K. Morokuma, O. Farkas, J. B. Foresman, and D. J. Fox, Gaussian, Inc., Wallingford CT, 2016.

<sup>3</sup> N. M. O'Boyle, A. L. Tenderholt and K. M. Langner., *J. Comp. Chem.*, 2008, **29**, 839–845.

<sup>4</sup> T. Lu and F. Chen, *J. Comput. Chem.* 2012, **33**, 580-592.

<sup>5</sup> C. Würth, M. Grabolle, J. Pauli, M. Spieles, and U. Resch-Genger, *Nat. Protoc.*, 2013, **8**, 1535–1550.

<sup>6</sup> Z. Liu, T. Lu and Q. Chen *Carbon*, 2020, **165**, 461-467.
